1 **The multimodal action of G alpha q in coordinating growth**  
2 **and homeostasis in the *Drosophila* wing imaginal disc**

3  
4 **Vijay Velagala<sup>1, #</sup>, Dharsan K. Soundarrajan<sup>1, #</sup>, Maria F. Unger<sup>1, #</sup>, David Gazzo<sup>1</sup>,**  
5 **Nilay Kumar<sup>1</sup>, Jun Li<sup>3</sup>, Jeremiah Zartman<sup>1,2 \*</sup>**

6  
7 <sup>1</sup> Department of Chemical and Biomolecular Engineering, University of Notre Dame, Notre  
8 Dame, IN 46556

9  
10 <sup>2</sup> Department of Biological Sciences, University of Notre Dame, Notre Dame, IN 46556

11  
12 <sup>3</sup> Department of ACMS, 171 Hurley Hall, University of Notre Dame, Notre Dame, IN 46556<sup>2</sup>  
13 Department of Applied and Computational Mathematics and Statistics

14  
15 \*Correspondence: [jzartman@nd.edu](mailto:jzartman@nd.edu)

16  
17 #These authors contributed equally

18  
19 Keywords: Ca<sup>2+</sup>, Dilp-8, growth control, developmental timing, *Drosophila* wing disc

20

21

22

23

24

25 **Abstract**

26

27 **Background**

28 G proteins mediate cell responses to various ligands and play key roles in organ development.  
29 Dysregulation of G-proteins or Ca<sup>2+</sup> signaling impacts many human diseases and results in birth  
30 defects. However, the downstream effectors of specific G proteins in developmental regulatory  
31 networks are still poorly understood.

32 **Methods**

33 We employed the Gal4/UAS binary system to inhibit or overexpress *Gaq* in the wing disc, followed  
34 by phenotypic analysis. Immunohistochemistry and next-gen RNA sequencing identified the  
35 downstream effectors and the signaling cascades affected by the disruption of *Gaq* homeostasis.

36 **Results**

37 Here, we characterized how the G protein subunit *Gaq* tunes the size and shape of the wing in  
38 the larval and adult stages of development. Downregulation of *Gaq* in the wing disc reduced wing  
39 growth and delayed larval development. *Gaq* overexpression is sufficient to promote global Ca<sup>2+</sup>  
40 waves in the wing disc with a concomitant reduction in the *Drosophila* final wing size and a delay  
41 in pupariation. The reduced wing size phenotype is further enhanced when downregulating  
42 downstream components of the core Ca<sup>2+</sup> signaling toolkit, suggesting that downstream Ca<sup>2+</sup>  
43 signaling partially ameliorates the reduction in wing size. In contrast, *Gaq*-mediated pupariation  
44 delay is rescued by inhibition of IP<sub>3</sub>R, a key regulator of Ca<sup>2+</sup> signaling. This suggests that *Gaq*  
45 regulates developmental phenotypes through both Ca<sup>2+</sup>-dependent and Ca<sup>2+</sup>-independent  
46 mechanisms. RNA seq analysis shows that disruption of *Gaq* homeostasis affects nuclear  
47 hormone receptors, JAK/STAT pathway, and immune response genes. Notably, disruption of *Gaq*

48 homeostasis increases expression levels of Dilp8, a key regulator of growth and pupariation  
49 timing.

50 **Conclusion**

51 Gαq activity contributes to cell size regulation and wing metamorphosis. Disruption to Gαq  
52 homeostasis in the peripheral wing disc organ delays larval development through ecdysone  
53 signaling inhibition. Overall, Gαq signaling mediates key modules of organ size regulation and  
54 epithelial homeostasis through the dual action of Ca<sup>2+</sup>-dependent and independent mechanisms.

## 55 **Abbreviations**

- 56 **AkhR**: Adipokinetic Receptor
- 57 **chinmo**: chronologically incorrect morphogenesis
- 58 **DAG**: diacylglycerol
- 59 **DAPI**: 4',6-Diamidino-2-phenylindole dihydrochloride
- 60 **DCP**: Cleaved Drosophila Dcp-1 (Asp215) Antibody
- 61 **DCP-1**: death caspase-1
- 62 **Dpp**: Decapentaplegic
- 63 **DUOX**: Dual oxidase
- 64 **Eig**: Ecdysone-induced gene
- 65 **ER**: endoplasmic reticulum
- 66 **ERK**: extra-cellular-signal-regulated protein kinase
- 67 **GDP**: guanosine diphosphate
- 68 **GO**: Gene Ontology
- 69 **GPCRs**: G protein-coupled receptors
- 70 **GTP**: guanosine triphosphate
- 71 **Gαq O.E.**: G alpha q Overexpression
- 72 **Gαq RNAi**: G alpha q RNAi
- 73 **Gαq**: G alpha q
- 74 **Hh**: Hedgehog
- 75 **Hr**: Hormone receptor
- 76 **Hsp**: Heat shock protein
- 77 **ICWs**: intracellular calcium waves
- 78 **Im33**: Immune-induced molecule 33
- 79 **IP3**: inositol trisphosphate

- 80 **IP3R**: IP3 Receptor
- 81 **JNK**: Jun-N-terminal-Kinase
- 82 **Lys**: Lysozyme
- 83 **MAPK**: mitogen-activated protein kinase
- 84 **mthl**: methuselah-like
- 85 **NGS**: Normal Goat Serum
- 86 **Oatp74D**: Organic anion transporting polypeptide 74D
- 87 **PBS**: Phosphate-buffered saline
- 88 **Pdk1**: Phosphoinositide-dependent kinase 1
- 89 **PH3**: Phospho-Histone H3 (Ser10) Antibody
- 90 **PKC**: protein kinase C
- 91 **PLC- $\beta$** : phospholipase C $\beta$
- 92 **rk**: rickets
- 93 **RNA**: Ribonucleic acid
- 94 **RNAi**: RNA interference
- 95 **Serpin, Spn**: Serin Protease Inhibitor
- 96 **Spz**: Spatzle
- 97 **upd3**: unpaired3
- 98 **Wg**: wingless

99

100

101

102

103

## 104 **Background**

105 How organs achieve their final size and shape during development is a fundamental question that  
106 has long puzzled biologists[1]–[4]. Additionally, the control of size and shape for multicellular  
107 systems, including synthetic organoids, is a key consideration for many applications in cell and  
108 tissue engineering[5]. Organ size control relies on both intrinsic intra-tissue and extrinsic hormonal  
109 growth regulators[6]. Information transfer between external cues and intrinsic signals is essential  
110 for maintaining robust physiology. This is achieved, in part, by G-protein coupled receptors  
111 (GPCRs), which constitute the largest family of receptors bound to the plasma membrane.  
112 GPCRs encode a diverse range of external signals into internal signaling dynamics, thereby  
113 modulating diverse physiological processes, including growth and proliferation[7]. Heterotrimeric  
114 G proteins form a vital component for the GPCR-mediated signaling cascade[8]–[10]. G proteins  
115 are coupled to GPCRs and are known to regulate a wide range of secondary messengers. In  
116 addition, G proteins transmit mitogenic signals from hormones and other ligands across the  
117 plasma membrane into the cell through its coupled receptors and mediate the cell's response to  
118 these signals[9], [11]–[15].

119  
120 G proteins are ubiquitous in plants and in all animals ranging from *Drosophila* to humans[16]. G-  
121 proteins are composed of  $\alpha$ ,  $\beta$ , and  $\gamma$  subunits that are associated with GPCRs as heterotrimeric  
122 complexes (**Fig. 1A**), where each subunit is classified into different families based on their  
123 structure and function[11]. For instance, the  $G\alpha$  subunit is classified into four families:  $G\alpha_i$ ,  $G\alpha_s$ ,  
124  $G\alpha_{12/13}$ , and  $G\alpha_q$ . Upon binding of the agonist, the receptor alters its conformation, leading to  
125 guanosine diphosphate (GDP) from  $G\alpha$  being exchanged with guanosine triphosphate (GTP)[17].  
126 GTP-bound  $G\alpha$  dissociates from the heterotrimeric complex and activates phospholipase C  $\beta$   
127 (PLC  $\beta$ )[18]. Subsequently, PLC  $\beta$  promotes the hydrolysis of phosphatidylinositol 4,5-  
128 biphosphate into second messengers diacylglycerol (DAG) and inositol trisphosphate (IP<sub>3</sub>)[19].

129 DAG further activates protein kinase C (PKC)[20], whereas IP<sub>3</sub> stimulates the release of Ca<sup>2+</sup> from  
130 the endoplasmic reticulum (ER) (**Fig. 1A, B**) by binding to the IP<sub>3</sub> Receptor (IP<sub>3</sub>R)[19], [21]–[24].  
131 Subsequently, Ca<sup>2+</sup> binds to a range of proteins to generate diverse cellular responses[25]. More  
132 generally, G proteins transduce signals from extracellular cues to generate a range of second  
133 messengers such as IP<sub>3</sub>, DAG, and Ca<sup>2+</sup>, thus providing the framework to develop a broad range  
134 of cellular responses[26].

135

136 Of note, Gαq serves as a key regulator of diverse biological processes, including growth, glucose  
137 transport, actin cytoskeleton regulation, cardiac physiology, and development in various model  
138 systems[13], [14], [27], [28]. For example, Gαq is essential for embryonic cardiomyocyte  
139 proliferation and cardiac development in mice[29]. Further, mice lacking both *Gαq* and *Gα11* died  
140 during embryonic development[29]. Interestingly, mice carrying a mutation for *Gαq* showed  
141 retardation in cerebellar maturation, resulting in ataxia and motor discoordination[30]. Also, the  
142 loss of *Gαq* and one *Gα11* allele in glial and precursor cells resulted in reduced somatic  
143 growth[31]. Moreover, this growth impairment is due to a decrease in the growth hormone release  
144 hormone (GHRH), thereby impairing somatotrophic cell proliferation and reducing somatic growth.  
145 Surprisingly and in contrast, Parton et al. showed that a loss-of-function mouse mutant of *Gαq* in  
146 the liver and white adipose tissue results in increased body mass and hyper adiposity[27]. These  
147 genetic depletion studies highlight that the *Gαq* is essential for normal development and can act  
148 as a growth regulator, with differential phenotypes dependent on cell type. In addition to growth  
149 and development, Gαq regulates a diverse set of biological processes. For example, *Gαq* activity  
150 is required for insulin-induced glucose transport in adipocytes[13]. Further, the Adipokinetic  
151 Receptor (AkhR) functions through the Gαq/Gγ1/Plc21C signaling module to regulate body fat  
152 storage in adult *Drosophila*[28]. Mutations in the gene that encodes Gαq subunits have been  
153 shown to control skin color and hair color in mouse models[32]. Overall, these studies underscore

154 the complexity of the diverse biological functions that Gαq performs across a broad range of  
155 biological contexts, and in many cases, the downstream pathways remain to be elucidated.

156

157 Activating *Gαq* mutations either promotes or inhibits growth based on the level of expression and  
158 cellular physiology[15]. For example, expression of the constitutive active form of *Gαq*  
159 (*GαqQ209L*) induced cellular transformation in NIH-3T3 cells[33], [34]. Moreover, Gαq promotes  
160 mitogenic activity through its interaction with different mitogen-activated protein kinase (MAPK)  
161 signaling pathways[35]–[39]. For instance, Garcia-Hoz et al. reported that the interaction between  
162 Gαq and PKCζ is essential for the activation of the extra-cellular-signal-regulated protein kinase  
163 (ERK) signaling cascade in cardiac myocytes and fibroblasts[40]. Additionally, activating  
164 mutations in *GNAQ*, the gene encoding the Gαq subunit in humans, contribute significantly to the  
165 progression of uveal melanoma[32], [41], [42]. However, constitutively active Gαq also can inhibit  
166 cell growth in multiple contexts[39], [43], [44]. For example, Kalinec et al. reported that the  
167 transfection of *GαqQ209L* (the mutationally active form) in NIH-3T3 cells resulted in fewer  
168 colonies and further strongly suggested that high levels of GαqQ209L are cytotoxic to cells[43].  
169 Similar findings are reported by Qian et al., where they observed that the expression of the  
170 mutationally active form of Gαq (Gα16) partially inhibited growth in NIH-3T3 cells[45]. Likewise,  
171 the expression of an active form of Gα16 inhibits growth in small-cell lung carcinoma cells[39].  
172 Further, this study reported an increase in c-Jun-N-terminal-Kinase (JNK) signaling cascade upon  
173 Gα16 expression, thereby suggesting a possible mechanism for growth inhibition. Based on these  
174 contrasting effects, it can be inferred that the mutationally active form of Gαq expression regulates  
175 growth in a cell-specific manner and subsequently induce different growth phenotypes. However,  
176 despite advances in characterizing the functional roles of G proteins in a range of cell types, there  
177 is a lack of a general systems-level understanding of how G protein signaling impacts organ  
178 growth.

179



180 Previously, we have shown that perturbing *Gaq* expression regulates the size of *Drosophila* wings  
181 [46]. Further, we identified that the overexpression of wildtype *Gaq* is correlated with the  
182 occurrence of intercellular  $Ca^{2+}$  waves (ICWs) in *ex vivo* wing disc cultures[46]. Further, *Gaq* is  
183 required for wound-induced  $Ca^{2+}$  waves in the pupal notum[47], [48]. Cumulatively, *Gaq* can either  
184 promote or inhibit growth depending on the cellular context and the expression levels. However,  
185 the precise molecular mechanisms through which *Gaq* transduces the growth regulatory signals  
186 are not known. This can be primarily attributed due to the wide range of second messengers it  
187 activates. For example, the contribution of *Gaq*-mediated  $Ca^{2+}$  signaling toward regulating organ  
188 growth parameters, including size and shape, is currently unknown.

189  
190 To address this question in a well-defined and genetically accessible system, we used the  
191 *Drosophila* wing disc to identify the key downstream genes regulated downstream of *Gaq* loss-  
192 of-function and gain-of-function perturbations. The *Drosophila* wing imaginal disc is a key model  
193 for studying epithelial morphogenesis and signal transduction pathways, including  $Ca^{2+}$   
194 signaling[2], [49]–[52]. With the plethora of available genetic tools to generate organ or cell-  
195 specific mutants along with the short lifecycle of the *Drosophila*, the wing disc system provides a  
196 powerful platform to decode complex signaling mechanisms[53]. The wing disc is invaluable for  
197 phenotypic screening in early preclinical studies[54]–[56]. Multiple signaling pathways, such as  
198 the Bone Morphogenetic Protein BMP (*Drosophila* Decapentaplegic/Dpp), Wnt (*Drosophila* Wg),  
199 and Hedgehog (Hh), coordinate the patterning of epithelial cells and were discovered in the wing  
200 imaginal disc[57]–[59]. In *Drosophila*, *Gaq* plays a key role in regulating neuronal pathfinding[60].  
201 Additionally, it is involved in regulating gut innate immunity through the modulation of DUOX[61].  
202 Also of note, GPCRs are known to regulate metamorphosis by transmitting ecdysone signaling  
203 and controlling hormone production through the nuclear hormone pathway[62]–[66]. Altogether,  
204 these studies have established different functional roles assumed by *Gaq* in *Drosophila*. However,

205 the organ-specific role of *Gaq* in the growth regulation of peripheral non-neural organ  
206 development is relatively less studied.

207

208 Here, we combined genetic, phenotypic, and transcriptomic analysis to map the phenotypic  
209 consequences of perturbing *Gaq* homeostasis during organ development to downstream  
210 biological processes and pathways. Organ size regulation extensively relies on robust  
211 coordination between growth rate and developmental time. We show that *Gaq* perturbations affect  
212 both the wing growth and the larval-to-pupal transition time, thereby affecting the final wing size.  
213 Our RNA-seq analysis confirms that *Gaq* modulates key signaling events that regulate growth  
214 and developmental time. Thus, *Gaq* orchestrates the final wing size by interacting with key  
215 components of the signaling cascades regulating growth and developmental timing. Additionally,  
216 we investigated whether suppressing *Gaq*-mediated calcium signaling suppresses the reported  
217 phenotypes. We found that suppressing calcium signaling components downstream of *Gaq*  
218 overexpression suppressed the pupariation delay and further decreased growth. These results  
219 suggest that the balance of *Gaq* regulation of growth through  $\text{Ca}^{2+}$ -dependent and  $\text{Ca}^{2+}$ -  
220 independent mechanisms determine the net phenotypic consequences of perturbed *Gaq* activity  
221 during wing development. Overall, this study highlights the multimodal action of the *Gaq* in  
222 balancing growth through the dual action of its protein-protein interactions and secondary  
223 messenger regulation and provides a potential mechanism that explains the differential growth  
224 outcomes across biological contexts.

225

226

227

228

## 229 **Results**

230

### 231 **Gαq homeostasis is necessary for optimal organ size**

232 Gαq signaling has been demonstrated to be essential for the initiation of Ca<sup>2+</sup> waves in wounded  
233 tissues[48]. In addition, our previous study showed that *Gαq* overexpression leads to the  
234 formation of intracellular calcium waves (ICWs) in the wing disc pouch cells cultured *ex vivo*[25],  
235 [46]. Here, we confirmed this result *in vivo* by imaging larva co-expressing both GCaMP6f and  
236 *Gαq* in the wing disc (**Fig. 1C, D**). Both *ex vivo* and *in vivo* imaging confirmed that the *Gαq*  
237 expression in the wing disc leads to the formation of regular and repeating ICWs.

238

239 Either overexpression or RNAi-mediated inhibition of *Gαq* in the wing disc pouch cells leads to  
240 reduced adult wing size, but it is unknown which downstream growth regulatory pathways might  
241 be impacted[46], [67]. To further characterize the roles of *Gαq* in regulating organ growth, we  
242 extended and confirmed our phenotypic analysis by testing the impact of *Gαq* perturbation using  
243 additional Gal4 drivers, including nubbin-Gal4, MS1096-Gal4, and C765-Gal4. The reported  
244 experiments utilize a binary expression system based on the expression of the yeast Gal4  
245 transcription factor, which is driven by a tissue-specific promoter[53]. Consequently, analysis with  
246 multiple Gal4 drivers helps to compare the impact of a given Gal4 line. We next quantified the  
247 phenotypic consequences for both overexpression and knockdown of *Gαq* levels. First, we  
248 measured the average wing size for the control crosses of each Gal4 line expressing *RyR<sup>RNAi</sup>*, a  
249 control construct that has no known phenotype and targets a gene with no known expression in  
250 the wing disc[67] (**Fig. 2A-C**). Next, we knocked down *Gαq* with RNAi constructs using multiple  
251 Gal4 drivers (**Fig. 2D-F**). Interestingly, *Gαq* knockdown under the control of the nubbin-Gal4 driver  
252 leads to a failure in wing expansion (**Fig. 2D**). However, the other Gal4 drivers led to relatively  
253 normally patterned wings with reduced wing size (**Fig. 2E, F, J**). This phenotypic variance for

254 different Gal4 drivers may be attributed to the variation in the spatial-temporal expression patterns  
255 of the Gal4 drivers. For instance, MS1096-Gal4 is expressed strongly in the dorsal region of the  
256 wing disc pouch during larval and prepupal stages[68], [69], whereas the C765-Gal4 driver is  
257 uniformly active in the larval wing disc from the second instar onwards[70]. The protein product  
258 of the *nubbin* gene is present from the early second instar onwards but strongly expressed in the  
259 third instar discs[71]. Next, we overexpressed *Gaq* in the wing disc using the Gal4 drivers  
260 mentioned above. Interestingly, we observed a reduction in the wing size for all the Gal4 drivers.  
261 Overexpression of *Gaq* with the MS1096-Gal4 driver showed a smaller wing size when compared  
262 with nubbin-Gal4 and C765-Gal4 drivers (**Fig. 2J**). Thus, these results indicate that *Gaq*  
263 homeostasis is essential for normal wing disc growth. Notably, either downregulation or  
264 upregulation reduces the final wing size. Further, the severity of the phenotype associated with  
265 *Gaq* downregulation varies depending on the Gal4 driver used for the transgenic expression of  
266 *Gaq*<sup>RNAi</sup>.

267

### 268 **Inhibition of Ca<sup>2+</sup> signaling enhances *Gaq* overexpression phenotypes**

269 Next, we investigated the role of *Gaq* mediated calcium signaling towards the growth inhibition  
270 caused by *Gaq* overexpression. Our previous findings demonstrated that the downregulation of  
271 Ca<sup>2+</sup> signaling components using the MS1096-Gal4 driver resulted in a size reduction of the adult  
272 wing[67]. To confirm this, we downregulated the Ca<sup>2+</sup> signaling components, including *small wing*  
273 (*sl: a homolog of PLCγ*)[72] and *IP<sub>3</sub>R*, using a C765-Gal4 driver (**Fig. 3A, E, G, I**). The release  
274 of Ca<sup>2+</sup> from ER to the cytoplasm is dependent on the binding of inositol trisphosphate (IP<sub>3</sub>) to the  
275 inositol trisphosphate receptor (IP<sub>3</sub>R). Further, IP<sub>3</sub> is produced by PLC through the hydrolysis of  
276 Phosphatidylinositol 4,5-bisphosphate (PIP<sub>2</sub>). Thus, a major mode of Ca<sup>2+</sup> signaling relies on IP<sub>3</sub>  
277 and PLC activity. Consistent with our earlier findings, we observed a reduction in the wing size  
278 for the knockdown of Ca<sup>2+</sup> signaling components. Additionally, the knockdown of PLCβ homolog

279 Phospholipase C at 21C (*Plc21C*) reduced the final wing size (**Fig. 3C, I**). These results imply that  
280 Gαq-mediated Ca<sup>2+</sup> signaling promotes growth during organ development.

281

282 In contrast, *Gαq* overexpression, which increases Ca<sup>2+</sup> activity in the wing disc, reduces the final  
283 wing size. As a next step, we investigated whether regulators of Ca<sup>2+</sup> activity contribute to the  
284 reduction in wing size. To answer this, we simultaneously overexpressed wildtype *Gαq* and  
285 downregulated Ca<sup>2+</sup> signaling components, such as *PLCs* and *IP<sub>3</sub>R*, using RNAi. We observed  
286 that the *Gαq* overexpression, along with the knockdown of Ca<sup>2+</sup> signaling components, enhanced  
287 the reduction in wing size (**Fig. 3A-I**). This double perturbation analysis suggests that Gαq-  
288 mediated Ca<sup>2+</sup> signaling promotes growth, whereas growth inhibition due to *Gαq* overexpression  
289 occurs through a mechanism independent of Ca<sup>2+</sup> signaling. Altogether, our results imply that  
290 Gαq plays a dual role, where it promotes growth through a Ca<sup>2+</sup>-dependent and inhibits growth  
291 through a Ca<sup>2+</sup>-independent mechanism.

292

### 293 **Perturbation of Gαq levels resulted in increased cell density and decreased cell** 294 **number**

295 To examine whether Gαq mediates growth by regulating cell proliferation, we performed  
296 immunohistochemistry to measure Phospho-Histone H3 (PH3) levels in the wing discs. We  
297 quantified the PH3 levels in the wing disc by calculating the proliferation density. We measured  
298 the proliferation density by dividing the total area of the nuclei positive for PH3 by the pouch area  
299 (**Fig. 4**). Our analysis revealed that the cell proliferation density (PH3 per unit area of the wing  
300 disc) for both *Gαq* perturbations (overexpression or RNAi mediated inhibition) was higher than  
301 those of the control condition. Moreover, we identified that the wing discs were smaller in both  
302 *Gαq* perturbations (overexpression and downregulation) compared to the control condition (**Fig.**  
303 **4D**). (**Fig. 4E**). Next, we analyzed the trichome number and trichome density, as the trichome

304 number indirectly represents the total number of cells in the wing. Our analysis revealed that the  
305 trichome number decreased significantly with the knockdown of *Gaq* (**Fig. 4G**), whereas *Gaq*  
306 overexpression showed no change in the trichome number. However, the trichome density was  
307 significantly higher for both overexpression and knockdown conditions (**Fig. 4I**). An increase in  
308 the trichome density (**Fig. 4I**) indicates that the average cell area is smaller for both *Gaq*  
309 perturbations. Cumulatively, these results indicate that *Gaq* overexpression reduces cell size,  
310 whereas *Gaq* knockdown reduces cell number and size.

311  
312 Next, we extended the trichome analysis for individual intervein regions to investigate the effects  
313 of *Gaq* perturbations on intervein regions. Our intervein analysis showed that the trichome number  
314 decreases in all the intervein regions for the *Gaq* knockdown. In contrast, the trichome number  
315 increased for *Gaq* overexpression in the intervein regions 3, 4, and 5 (as defined in **Additional**  
316 **File 1, Fig. S1A**). Hedgehog (Hh) signaling has been associated with regulating the growth and  
317 patterning of the L3-L4 region of the wing, which corresponds to the intervein region 4[73]. Further,  
318 our trichome density analysis shows a different trend in the intervein regions 3 and 5. We  
319 observed that the trichome density did not show any significant difference in intervein region 5 for  
320 either inhibition of *Gaq* or overexpression of *Gaq* (**Additional File 1, Fig.S1B**). Intervein regions  
321 3 and 5 are associated with high levels of Hedgehog (Hh) signaling and Decapentaplegic (DPP)  
322 signaling during larval development, respectively[74] (**Additional File 1, Fig.S1B** ). Together,  
323 these results confirm that perturbation to *Gaq* levels impacts cell proliferation and growth, thus  
324 affecting the final cell number and cell size. However, this effect is also dependent on the  
325 background signaling in different wing regions.

326

327

328 **Caspase-mediated apoptotic response in *Gaq* perturbations does not influence**  
329 **wing size**

330 To determine whether apoptosis is stimulated by perturbing levels of *Gaq*, we performed  
331 immunostaining for death caspase-1 (*Dcp-1*), a marker of programmed cell death (**Fig. 5A**). As  
332 caspases play an essential role in apoptosis[75], we quantified the area of *Dcp-1* expressing cells  
333 in both *Gaq* overexpression and knockdown conditions. Surprisingly, we discovered that either  
334 increasing or decreasing the levels of *Gaq* slightly decreased the *Dcp-1*-induced apoptotic cells  
335 in the wing disc. However, this effect was not statistically significant, given the relative background  
336 levels of *Dcp-1* staining (**Fig. 5A, F**). To test whether *Gaq*-mediated apoptotic response  
337 determines the reduced wing size, we co-expressed both wildtype *Gaq* and baculovirus *p35* in  
338 the larval wing disc using the *C765-Gal4* driver and assayed for the final adult wing phenotype.  
339 Baculovirus *p35* inhibits cell death in developing eyes and fly embryos[76] and inhibits  
340 caspases[75]. Co-expression of *Gaq*, along with *p35*, could not rescue the wing blade reduction.  
341 Interestingly, we observed a further reduction in the wing blade area when both *p35* and *Gaq*  
342 were expressed (*C765 > Gaq;+ > p35*) in the wing disc (**Fig. 5B-E**). In summary, inhibition of  
343 apoptosis by ectopic expression of apoptosis inhibitor *p35* did not rescue wing size reduction due  
344 to overexpression of *Gaq*. Our results thus indicate that caspase-mediated apoptotic response is  
345 not a major determinant in reducing the size of wings when *Gaq* levels are perturbed.

346

347 ***Gaq* overexpression stimulates stress response genes**

348 To examine the transcriptional profile activated by *Gaq* overexpression, we performed RNA-seq  
349 on control discs expressing a control construct (*RyR<sup>RNAi</sup>*, which has no known effect on wings)  
350 and discs overexpressing *Gaq* (under the control of the *C765-Gal4* driver). Compared to the  
351 control discs, overexpression of *Gaq* with the *C765-Gal4* driver resulted in 3613 differentially  
352 expressed genes with an adjusted p-value (p-value adjusted using Benjamini-Hochberg) of less

353 than 0.05 (**Additional File 1, Fig. S2A**). Of these genes, 2009 had a fold change greater than  
354 1.5, with 878 genes upregulated and 1131 genes downregulated. To ascertain the biological  
355 processes affected by the differentially expressed genes, we performed a Gene Ontology (GO)  
356 enrichment analysis of the genes having an absolute log fold change greater than 0.6 (abs  
357 ( $\log_2FC \geq 0.6$ )). Based on our GO analysis, we found enrichment in biological processes related  
358 to DNA replication, cuticle development, molting cycle, myofibril assembly, and protein refolding  
359 (**Additional File 1, Fig. S2B**). To investigate the biological processes that were activated or  
360 suppressed, we examined the significantly upregulated and downregulated genes separately.

361  
362 First, we performed a GO enrichment analysis of the upregulated genes having a fold change  
363 greater than 1.5 ( $\log_2FC \geq 0.6$ ) (**Additional File 1, Fig. S3A**). According to our GO analysis, we  
364 identified that the upregulated genes are involved in biological processes related to DNA  
365 replication, ribosome biogenesis, chromosome segregation, mitotic cell cycle process, and cuticle  
366 development. Moreover, we examined the relationships between the top enriched GO terms  
367 (**Additional File 1, Fig. S3B**) and identified that the top GO terms cluster under DNA replication,  
368 ribosome biogenesis, and cuticle development (**Additional File 1, Fig. S3B**). Additionally, we  
369 examined the genes associated with the enriched biological processes and their respective fold  
370 change values. We observed that the majority of the upregulated genes were related to the DNA  
371 replication and the mitotic cell cycle process, consistent with the possibility that the wing discs  
372 were physiologically younger and were proliferating (**Additional File 1, Fig. S3C**). Upon removing  
373 the redundant GO terms, we found that the upregulated genes are also involved in biological  
374 processes related to muscle cell development, non-membrane-bound organelle assembly,  
375 actomyosin structure organization, and protein refolding (**Additional File 1, Fig. S4**). Moreover,  
376 we found upregulation in heat shock proteins (*Hsp 70Ba*), which is related to the GO terms such  
377 as protein refolding (**Additional File 1, Fig. S4**). As well we observed an upregulation in myosin



378 heavy chain (*Mhc*) and myosin light chain (*Mlc2*), which are involved in the GO terms such as  
379 muscle cell development and actomyosin structure organization (**Additional File 1, Fig. S4**).

380

381 Our analysis further revealed the downregulation of Serine Protease Inhibitors (Serp100A, Spn  
382 100A) (**Additional file 2**) as well as an increase in serine proteases, including multiple Jonah  
383 genes (**Additional File 1, Fig. S5**). Serine proteases are linked to the GO terms such as serine  
384 hydrolase, peptidase activity, hydrolase activity, and endopeptidase activity (**Additional File 1,**  
385 **Fig. S5**). Serine proteases initiate proteolysis, thus eliciting various immune responses to  
386 infection[77]. Moreover, Jonah genes are expressed during larval development and exclusively in  
387 the midgut[78]. In addition, we observed that the upregulated heat shock proteins were also  
388 associated with the hydrolase activity (**Additional File 1, Fig. S5**). Activation of heat shock  
389 proteins is a defense mechanism employed by cells in response to stress caused by the  
390 accumulation of abnormal or denatured proteins[79], [80] (proteins having defects in folding). Our  
391 GO analysis supports this result as we observe an enrichment in biological processes related to  
392 protein refolding and folding (**Additional File 1, Fig. S4**). Upregulation of heat shock proteins,  
393 particularly *Hsp70*, implies the possibility of stress accumulation in the cells. Further, induction of  
394 *Hsp70* proteins is known to reduce the growth rate in *Drosophila* cells[81, p. 70], which is  
395 potentially consistent with reduced cell size phenotypes and associated reduction in overall wing  
396 growth.

397

398 Additionally, our RNA seq analysis revealed upregulation of genes associated with chitin-based  
399 cuticle development, cuticle development, structural constituent of the cuticle, encapsulating  
400 structure, and extracellular matrix (**Additional File 1, Fig. S3-S5**). An important consideration is  
401 that the amount of cuticle proteins produced by a larva varies along with its developmental stage.  
402 Furthermore, cuticle protein synthesis depends on the 20-hydroxyecdysone (20E) levels and  
403 occurs during periods of decline in ecdysteroid levels[82]. Moreover, our analysis revealed an

404 increase in Dilp8 RNA levels, which also corresponds to the GO term external encapsulating  
405 structure (**Additional File 1, Fig. S5**). Dilp8 is an insulin-like peptide regulating the timing of  
406 growth and, thus, the larval-to-pupal transition[83], [84]. In summary, our analysis identified that  
407 *Gaq* overexpression increased the activity of serine proteases and heat shock proteins and  
408 affected cuticle protein synthesis. Based on our GO enrichment analysis, we conclude that the  
409 *Gaq* overexpression upregulates genes involved in DNA replication, protein folding, and cuticle  
410 protein synthesis.

411  
412 As a next step, we extended our enrichment analysis to the downregulated genes ( $\log_2FC \leq -0.6$ )  
413 (**Additional File 1, Fig. S6**). Enrichment analysis revealed that the significantly downregulated  
414 genes mainly correspond to biological processes such as the molting cycle, axon development,  
415 larval development, cell adhesion, and cell morphogenesis (**Additional File 1, Fig. S6A**). Upon  
416 examining the similarity between the top GO terms, we identified that locomotion, axon guidance,  
417 and cell morphogenesis were closely related (**Additional File 1, Fig. S6B**). Additionally, we  
418 examined the downregulated genes that are related to the enriched GO terms. We observed that  
419 most of the genes downregulated were involved in locomotion, taxis, neuron projection  
420 development, and biological adhesion (**Additional File 1, Fig. S6C**). We identified that the cell  
421 death genes such as *head involution defective(hid)* and *Dronc* were downregulated and mapped  
422 to the GO term neuron projection development. In addition, we identified downregulation in  
423 cuticular proteins (*Cuticular protein 31A*, *Cuticular protein 72Ea*, etc.) and genes related to the  
424 molting cycle (**Additional File 1, Fig. S6C, Fig. S7**). Moreover, our analysis revealed a strong  
425 downregulation in 20-hydroxyecdysone (20E) target genes, which include *Hormone receptor 4*  
426 (*Hr4*), *Blimp-1*, and *Ecdysone-induced gene 71Ee (Eig71Ee)*. (**Fig. 6B&C, Additional File 1, Fig.**  
427 **S7C, Fig. S8**). Since ecdysone plays a pivotal role in the synthesis of cuticle proteins, we interpret  
428 that the low levels of ecdysone signaling might affect the deposition of cuticle proteins and their

429 timing of deposition. Collectively, these results demonstrate that *Gaq* overexpression inhibits  
430 ecdysone signaling and, as a result, affects cuticle protein synthesis.

431

### 432 ***Gaq* downregulation inhibits ecdysone-induced genes**

433 To determine the transcriptomic responses affected by the *Gaq* knockdown, we performed RNA  
434 sequencing on the wing discs expressing *Gaq*<sup>RNAi</sup> and the control discs expressing *RyR*<sup>RNAi</sup>.  
435 Compared to the control, 2667 genes were differentially expressed with an adjusted p-value less  
436 than 0.05. Of these genes, 1173 had absolute fold change greater than 1.5, of which 555 genes  
437 were upregulated, and 618 genes were downregulated (**Additional File 1, Fig. S9A**). To  
438 determine the biological processes enriched among the differentially expressed genes, we  
439 performed a gene ontology enrichment analysis of the genes that have a significant fold change  
440 ( $\text{abs}(\log \text{FC}) \geq 0.6$ ). GO classification analysis revealed that the differentially expressed  
441 transcripts were dominant in biological processes related to transmembrane transport, cuticle  
442 development, molting cycle, and chitin-based cuticle development (**Additional File 1, Fig. S9B**).  
443 Surprisingly, the enriched GO terms for the RNAi were mostly like those observed in the *Gaq*  
444 overexpression condition. Both overexpression and downregulation of *Gaq* resulted in the  
445 enrichment of biological processes related to the cuticle proteins, axon development, and molting  
446 cycle (**Fig. 6B, Additional File 1, Fig. S9B**).

447

448 Next, we performed the Gene Ontology enrichment analysis of the significantly upregulated genes  
449 with a fold change greater than 1.5 ( $\log \text{FC} \geq 0.6$ ). Our GO analysis of upregulated genes showed  
450 enrichment in biological processes related to cuticle development, mitotic spindle organization,  
451 and DNA replication (**Additional File 1, Fig. S10A**). After examining the upregulated genes  
452 relevant to the enriched GO terms, we identified that the upregulated genes were mainly involved  
453 in DNA replication and cuticle development. For instance, genes such as *Orc2* (*Origin recognition*

454 *complex subunit 2*), *Minichromosome maintenance 2 (Mcm2)*, and *Proliferating cell nuclear*  
455 *antigen (PCNA)* were upregulated and mapped to the GO terms such as DNA replication and  
456 DNA dependent DNA replication (**Additional File 1, Fig. S10C**). In addition, we identified  
457 upregulation in cuticle proteins such as *Cuticular protein 65Aw (Cpr65Aw, Cpr60D, etc.)*, which  
458 are associated with the GO term cuticle development (**Additional File 1, Fig. S10C**). In addition,  
459 our analysis revealed an upregulation in serine proteases which map to the hydrolase activity and  
460 peptidase activity (**Additional File 1, Fig. S11**). Overall, our analysis of upregulated genes  
461 revealed that *Gaq* knockdown disrupted cuticle protein synthesis.

462  
463 We then conducted a GO enrichment analysis of the downregulated genes to determine the  
464 biological processes associated with the downregulated genes. We identified that the  
465 downregulated genes enrich the GO terms associated with transmembrane transport, molting  
466 cycle, cell recognition, axon guidance, neuron projection guidance, and mating behavior  
467 (**Additional File 1, Fig. S12A**). After examining the gene expression relevant to the enriched GO  
468 terms, we identified that most of the downregulated genes were associated with cuticle  
469 development, molting cycle, transmembrane transport, taxis, and axon development.  
470 Interestingly, our analysis revealed downregulation in genes involved in ecdysone response  
471 regulation, including *ecdysone-induced protein 75B (Eig75)*, which mapped to the GO terms  
472 cuticle development and molting cycle[85]. As our study revealed downregulation in genes  
473 mediating ecdysone response, we examined the gene expression related to ecdysone signaling.  
474 Interestingly, we found that the downregulated ecdysone response genes predominantly belong  
475 to the *ecdysone-induced genes 71E* family (*Eig71E*), which also are associated with the defense  
476 and immune response (**Fig.6D, Additional File 1, Fig. S13**).

477  
478 *Eig71E* consists of five late-puff gene pairs that are transcribed divergently[86]. Moreover, the  
479 *Eig71E* family encodes small peptides that have biochemical characteristics similar to vertebrate

480 defensins and are thus assumed to provide an antimicrobial defense during metamorphosis[86].  
481 These genes are induced by the expression of early puff genes, which are directly regulated by  
482 the steroid hormone 20-hydroxyecdysone. As the *Eig71* family belongs to late puff genes, their  
483 expression would be moderate in L3 and increase in late L3. Our data show a strong  
484 downregulation of *Eig71E* genes for *Gaq<sup>RNAi</sup>* compared to the control (**Additional File 1, Figure**  
485 **S13**). Overall, this result suggests that the wing discs expressing *Gaq<sup>RNAi</sup>* were physiologically  
486 less mature when compared to the control discs. Hence, we observed a downregulation in the  
487 late puff genes (**Fig. 6F**), as their expression is restricted to late larval stages. As the expression  
488 of these *Eig71E* genes is induced by ecdysone, we hypothesize that downregulation in ecdysone  
489 signaling for the discs expressing *Gaq<sup>RNAi</sup>* (**Fig. 6C**). Compatible with this hypothesis, we  
490 observed a downregulation in ecdysone genes such as *Hr4* and *Blimp-1* (**Fig. 6C**). The results of  
491 our study also indicated a downregulation of *Organic anion transporting polypeptide 74D*  
492 (*Oatp74D*), a solute carrier transporter that is responsible for transporting ecdysteroids into  
493 cells[87] (**Additional File 1, Fig. S12**). We further identified that the genes related to cell death  
494 were downregulated (**Additional File 1, Fig. S13**). Most genes related to cell death have a  
495 significant fold change for both overexpression and RNAi conditions (**Fig. 6A**). In summary, our  
496 study showed that the downregulation of *Gaq* in the wing disc inhibits ecdysone pathway genes  
497 (**Additional File 1, Fig. S13**).

498

### 499 **Enrichment analysis of major signaling pathways**

500 We next examined how *Gaq* perturbations affect the core signaling pathways that play imperative  
501 roles in growth and development. To achieve this, we performed an enrichment analysis to  
502 investigate the core signaling pathways that were significantly represented among the  
503 differentially expressed genes with statistically significant fold changes[88]. Our analysis identified  
504 that the Toll signaling and nuclear hormone receptor pathway were significantly enriched among  
505 the differentially expressed genes in the *Gaq* overexpression condition (**Fig.7A, B**). In the case

506 of *Gaq<sup>RNAi</sup>*, the nuclear hormone receptor pathway was enriched among the differentially  
507 expressed genes. In addition, we analyzed upregulated and downregulated genes separately to  
508 identify the enrichment of core pathways among them. We found that the JAK/STAT pathway was  
509 significantly enriched among the upregulated genes for the *Gaq* overexpression, and no pathway  
510 was enriched among the upregulated genes for *Gaq<sup>RNAi</sup>*. Next, our analysis revealed that the  
511 nuclear hormone and the Toll signaling pathway were enriched among the downregulated genes  
512 for *Gaq* overexpression. For *Gaq<sup>RNAi</sup>*, the nuclear hormone receptor pathway was significantly  
513 enriched among the downregulated genes. In summary, our enrichment analysis revealed that  
514 the nuclear hormone receptor, JNK/STAT, and Toll pathways were significantly enriched for *Gaq*  
515 OE, whereas the nuclear hormone receptor pathway was significantly affected for *Gaq<sup>RNAi</sup>* (**Fig**  
516 **7A, B**).

517  
518 Following this, we examined gene expression changes associated with specific components of  
519 the core signaling pathways that were affected. As a first step, we examined changes in the gene  
520 expression of Toll signaling components. Toll signaling regulates cellular immune response and  
521 mediates cell elimination by regulating growth and apoptosis[89], [90]. Our analysis showed a  
522 significant upregulation in the *Toll-9* for both *Gaq* perturbations (**Additional File 2**). Additionally,  
523 we observed an approximate two-fold upregulation in *spatzle-4* (*spz4*) for *Gaq<sup>RNAi</sup>* and *spatzle-5*  
524 (*spz5*) for *Gaq* OE perturbations. However, we observed a downregulation in *spatzle* (*spz*) for  
525 *Gaq* OE condition (**Additional File 1, Fig. S14**). Cleaved Spatzle is known to activate the Toll  
526 pathway in unfit cells during cell competition, thereby activating cell death[89], [91]. Upregulation  
527 of *spatzle-4* and *spatzle-5* in our analysis likely resulted from the upregulation of serine proteases.  
528 Serine proteases induce proteolytic cleavage of Spatzle during an immune response resulting in  
529 the Toll activation[92]–[94]. Cleaved Spatzle binds to the Toll receptor and initiates the nuclear  
530 localization of *Dorsal-related immunity factor* (*Dif*), resulting in the transcription of several  
531 immunity genes. Our RNA seq results showed an increase in fold change values of *Dif* for both

532 perturbations (**Additional File 1, Fig. S14, Fig. S15**)[95]. Of note, studies have shown that  
533 activation of Toll signaling in fat body cells inhibits insulin signaling in a non-autonomous manner,  
534 thereby resulting in reduced body growth [96]–[98]. Our analysis revealed a strong  
535 downregulation in *Phosphoinositide-dependent kinase 1 (Pdk1)* for both *Gaq* overexpression and  
536 downregulation (**Fig. 6D, Additional File 1, Fig. S14, Fig. S15**). *Pdk1* acts upstream of *Akt*  
537 phosphorylation, and Toll signaling inhibits *Akt* phosphorylation in fat body cells[96], [98].  
538 Normally, microbial peptides and unmethylated CpG DNA sequences activate the Toll-9 receptor.  
539 Our data shows upregulation in heat shock proteins for both *Gaq* perturbations, which can induce  
540 the activation of Toll receptors. As *Gaq* perturbations affected the expression of multiple  
541 components of Toll signaling, we propose that *Gaq* might play roles in Toll signaling, thus possibly  
542 affecting growth and apoptosis.

543

544 As Toll signaling activates an immune response, we asked whether immune-related genes were  
545 affected. We examined the fold change values of the immune signaling components in both *Gaq*  
546 overexpression and *Gaq*<sup>RNAi</sup> perturbations (**Additional File 1, Fig. S14, Fig. S15**). We observed  
547 a downregulation in the immune response genes for both perturbations, except for the genes  
548 including *Immune induced molecule 33 (Im33)*, *Lysozyme S (LysS)*, and *Lysozyme B (LysB)*.  
549 *IM33* is strongly upregulated for both perturbations and could act downstream of the Toll pathway.

550

551 Since upregulated genes in *Gaq* OE affected JAK/STAT signaling, we examined the expression  
552 change in specific components of JAK/STAT signaling. We observed that *unpaired 3 (upd3)* was  
553 upregulated with *Gaq* overexpression with a three-fold change (**Additional File 1, Fig. S14**).  
554 *Unpaired3 (upd3)*, interleukin-6-like cytokine) is implicated in immunity, repair, gene expression,  
555 and development[99]–[101] through its activation of the JAK/STAT signaling pathway. In addition,  
556 *chinmo (chronologically incorrect morphogenesis)*, a downstream effector of JAK/STAT  
557 signaling[102], is significantly upregulated in both *Gaq*<sup>RNAi</sup> (~12 fold) and *Gaq* OE (~46 fold)

558 **(Additional File 2)**. Further, we identified that both perturbations increased the expression of  
559 JAK/STAT target *dilp-8* (**Fig. 6D**). The release of Dilp-8 is triggered by the activation of JAK/STAT  
560 signaling, which leads to ecdysone inhibition, thereby slowing the growth[103]. Furthermore, Dilp8  
561 governs larval-to-pupal transition and developmental timing by regulating ecdysone signaling[84].  
562 In summary, our study identified that *Gaq* perturbations change the expression of multiple  
563 JAK/STAT signaling components, which may contribute to either growth or apoptosis[104], [105].

564 As *Gaq* perturbations affected the nuclear hormone receptor pathway, we examined the fold  
565 change values of nuclear hormone receptors. Nuclear receptors bind directly to DNA and  
566 modulate gene transcription. Our data showed that the majority of the nuclear hormone receptor  
567 genes were downregulated (**Fig. 6C**), except for *fushi tarazu transcription factor 1 (ftz-f1)* and  
568 *Ecdysone receptor (EcR)* (**Additional File 1, Fig. S14, Fig. S15**). Also, we observed a  
569 downregulation in ecdysone-induced genes for both perturbations. *Ftz-f1* is a nuclear receptor  
570 that transcriptionally regulates the synthesis of cuticle proteins and controls metamorphosis[82],  
571 [106]. Additionally, *EcR* is a nuclear receptor that mediates the tissue's response to ecdysteroids,  
572 which is integral to larval molting and metamorphosis[107]–[109]. *Ftz-f1* is a mid-prepupal puff  
573 gene, which also is expressed in the early second instar stage of larval development[106], [110].  
574 In addition, *EcR* is expressed during the second half of the second instar stage of larval  
575 development[108], [110]. Thus, upregulation in *ftz-f1* and *EcR* likely resulted from the delay in  
576 larval development caused by *Gaq* perturbations. Taken together, our study indicates that  
577 perturbing *Gaq* levels disrupt larval development by affecting ecdysone signaling and nuclear  
578 hormone expression.

579 As noted above, *dilp8* expression levels were significantly upregulated. So, we asked whether  
580 this increase in *dilp8* impacts the larval to pupal transition time when *Gaq* expression levels are  
581 perturbed[103]. To determine this, we performed a developmental timing assay, wherein we  
582 recorded the larval to pupal transition time for both control and *Gaq* perturbations. Consistent with



583 the RNA seq finding, we observed that the larvae with *Gaq* overexpression in the wing disc cells  
584 pupariated 24 h later than the wildtype larvae (**Fig. 8A**). Similarly, we observed a delay in larval  
585 to pupal transition by 12 h for *Gaq* knockdown (**Fig. 8A**). Overall, these results imply that the  
586 disruption of *Gaq* levels inhibits the ecdysone signaling, therefore, delaying the development to  
587 compensate for the reduced growth. One likely interpretation of these results is that *Gaq*  
588 overexpression in the wing disc elicits immune and stress response through activation of the  
589 JAK/STAT pathway. This might activate the heat shock proteins that decrease the growth rate of  
590 the wing. JAK/STAT stimulates *dilp-8* production, which signals the brain to inhibit ecdysone  
591 synthesis, thereby slowing down development. For the *Gaq*<sup>RNAi</sup> data, we interpret that decrease  
592 in Ca<sup>2+</sup> activity caused by *Gaq* downregulation leads to a reduction in growth. Calcium is an  
593 important second messenger that regulates multiple cellular responses, including growth and  
594 apoptosis[26], [67], [111]. Hence, we propose that the downregulation of *Gaq* affects growth  
595 through reduced Ca<sup>2+</sup>, thus negatively affecting ecdysone signaling. Strikingly, we observed Ip<sub>3</sub>R  
596 inhibition, along with *Gaq* overexpression, reduced the developmental delay (**Fig 8A**). As a result,  
597 this finding supports the hypothesis that increased calcium levels are responsible for increasing  
598 the growth time that occurs through the delay in larval to pupal transition when *Gaq* is  
599 overexpressed.

600

## 601 **Discussion**

602 Extracellular signals regulate organ development by embedding encoded information into the  
603 spatiotemporal dynamics of second messenger concentrations. G proteins play a vital role in  
604 mediating these external signals from GPCRs to downstream effectors by regulating key second  
605 messengers, including Ca<sup>2+</sup>, cAMP, and IP<sub>3</sub>, among others. Recent work has demonstrated that  
606 the spatiotemporal dynamics of Ca<sup>2+</sup> signaling correlate with changes in the final wing size in  
607 diverse ways, ranging from single-cell repetitive spiking to global traveling multicellular waves[67].

608 In particular, the G-protein *Gaq* stimulates  $\text{Ca}^{2+}$  waves in developing wing discs[46]. This also is  
609 accompanied by a reduction in wing size, which correlates recurring calcium waves with growth  
610 inhibition[67]. Yet, how perturbed *Gaq* expression impacts wing size and how calcium wave  
611 production is specifically involved remain unclear.

612

613 Recently, a study reported that inhibition of GPCRs, such as *ricketts (rk)*, *methuselah-like 4*  
614 (*mthl4*), *CG15744*, and *Stan*, reduce wing size[112]. Here, we confirm that the downregulation of  
615 *Gaq* in the wing disc results in smaller wings, independent of the Gal4 driver used. Additionally,  
616 we observed a similar size reduction with inhibition of *Gaq* using MS1096-Gal4 and C765-Gal4  
617 drivers. A more severe wing expansion defect was observed in wing discs inhibiting *Gaq* driven  
618 by the nubbin-Gal4 driver. Previous work reported that three G-proteins: *Gβ13F*, *Gy1*, and *Gas*,  
619 are essential for proper wing expansion[113]. Here, our study identified that *Gaq* expression levels  
620 also could impact wing expansion. A recent study by Sobala et al. reported that *Gas*, *Gaq*, and  
621 *Gβ13F* are expressed at different stages in the pupal wing disc during pupal wing  
622 development[114]. Our study confirms this observation as *Gaq* downregulation leads to defects  
623 in pupal wing expansion. Saad et al. reported similar post-expansion defects when GPCRs such  
624 as the *methuselah (mth)*-like family receptors *mthl6*, *mthl8* and *mthl9* were downregulated in the  
625 *Drosophila* wing under nubbin gal4 driver[112]. Future studies are required to identify the GPCRs  
626 that function upstream of *Gaq* to regulate organ growth or expansion phenotypes.

627

628 This study highlights the importance of *Gaq* homeostasis during organ growth. *Gaq* stimulates  
629  $\text{IP}_3$  production, which activates the  $\text{IP}_3\text{R}$  channel to release  $\text{Ca}^{2+}$  from ER[19], [115]–[120]. Our  
630 previous experimental studies investigated the emergence of diverse classes of spatiotemporal  
631  $\text{Ca}^{2+}$  dynamics in both *ex vivo* cultures and *in vivo*[46], [67]. Here, our *in vivo* imaging studies  
632 revealed an increase in  $\text{Ca}^{2+}$  activity and strong intercellular calcium wave (ICW) formation with  
633 *Gaq* overexpression (**Fig. 1B**), consistent with past *ex vivo*. This result confirms that *Gaq*

634 stimulates  $\text{Ca}^{2+}$  release from ER into the cytoplasm through the activation of its downstream  
635 effectors. Our previous studies show that normal physiological levels of calcium signaling promote  
636 wing disc growth[67]. Interestingly, further elevating calcium signaling through *Gaq*  
637 overexpression reduces wing size, thereby suggesting additional *Gaq* downstream effectors  
638 participating in growth regulation.

639

640 To assess whether *Gaq*-mediated  $\text{Ca}^{2+}$  signaling impacts the size phenotype, we performed  
641 genetic interaction experiments by overexpressing *Gaq* and co-expressing RNAi constructs  
642 targeting downstream regulators of  $\text{Ca}^{2+}$  signaling. Surprisingly, we found a statistically significant  
643 enhancement in wing size reduction when  $\text{Ca}^{2+}$  signaling components were inhibited along with  
644 *Gaq* overexpression. Thus, we hypothesize that the primary growth-inhibiting activity of *Gaq* may  
645 be through a mechanism independent of  $\text{Ca}^{2+}$  activity. Moreover, our trichome analysis for *Gaq*  
646 overexpression shows that the intervein regions associated with Hh signaling show a different  
647 trend in trichome number and density when compared to the overall wing. Our findings from this  
648 study imply that *Gaq* interacts with other growth signaling pathways, thus negatively influencing  
649 growth. Together, these results demonstrate the dual action performed by *Gaq* during wing  
650 development, where it stimulates growth through downstream  $\text{IP}_3\text{R}/\text{Ca}^{2+}$  activity and inhibits  
651 growth through its interactions with mitogenic pathways independent of  $\text{Ca}^{2+}$  activity. In addition  
652 to *Gaq*, our results show that the depletion of *Plc21c* levels, which is homologous to mammalian  
653  $\text{PLC}\beta$ , results in decreased adult wing size. This further supports our findings that the depletion  
654 of  $\text{Ca}^{2+}$  signaling components leads to a reduction in wing growth[67]. Future studies are required  
655 to investigate the role of *Gaq* mediated PKC activity in regulating the growth independent of the  
656  $\text{Ca}^{2+}$  signaling.

657

658 Our molecular and transcriptomic analysis investigated the downstream signaling motifs affected  
659 in response to *Gaq* perturbations. Our PH3 studies showed an increase in proliferation density

660 for both overexpression and RNAi wing discs. The higher proliferation density observed may be  
661 due to wing discs being physiologically younger than the control discs, so they proliferate more  
662 rapidly. Our transcriptomic study further confirms this result as we observed an upregulation in  
663 genes related to DNA replication for both *Gaq* perturbations. However, the trichome number  
664 studies showed a reduction in the overall trichome number for *Gaq*<sup>RNAi</sup>, whereas it did not show  
665 any significant change for *Gaq* overexpression. Moreover, the trichome density increased for both  
666 perturbations compared to the control and can be attributed to the reduced wing size. As cell size  
667 and number are indirect readouts of growth and proliferation, this result establishes that *Gaq*  
668 homeostasis is necessary for maintaining an optimal growth rate and duration of organ growth.  
669 Several studies identify the active role of *Gaq* while promoting growth and proliferation in different  
670 systems[14], [15], [121]. For example, *Gaq* mediates the PI3K activation and the subsequent  
671 airway smooth muscle growth[122]. In addition, GPCRs stimulate YAP phosphorylation via  
672 *Gaq*[123], thus regulating Hippo signaling in HEK cells. Taken together, our results demonstrate  
673 that *Gaq* impacts the final wing size by tuning growth and proliferation.

674  
675 Further, inhibition and overexpression of *Gaq* in the wing disc slightly decrease the total number  
676 of cells undergoing apoptosis. Furthermore, our RNA-seq analysis shows both upregulation and  
677 downregulation of apoptotic genes for both overexpression and RNAi conditions (**Fig. 6A**).  
678 Studies have shown that *Gaq* regulates cell death both positively and negatively in multiple  
679 systems[111], [124], [125]. For example, *Gaq* expression decreases apoptosis in cardiomyocytes  
680 through EGFR activation[124]. In addition, *Gaq* mediated ICWs inhibit excessive apoptosis during  
681 epithelial wound healing[126]. Conversely, *Gaq* activation by GPCR induces apoptosis by  
682 reducing PKC-dependent AKT activity in prostate cancer cells[125]. Collectively, these studies  
683 provide evidence that *Gaq* either stimulates or inhibits apoptosis. Consistent with these studies,  
684 our transcriptomic study shows that *Gaq* perturbations resulted in dysregulation of the apoptotic  
685 genes. However, our results show that inhibition of apoptosis along with *Gaq* overexpression

686 could not rescue the wing size phenotype, thereby suggesting a minimal role of apoptosis in  
687 regulating Gαq-mediated growth reduction.

688

689 Our transcriptomic study revealed that *Gαq* overexpression activates stress response genes,  
690 which include heat shock proteins and serine proteases. The expression of serine proteases is  
691 increased as serpins, which inhibit serine proteases, were downregulated in our RNA-seq data.

692 In addition, our findings show that JNK components, including *dilp8*, *upd3*, and *chinmo* were  
693 significantly upregulated. JNK signaling induces stress and immune response[127]–[130] and  
694 initiates compensatory proliferation[130]. Importantly, JNK signaling induces *dilp8* expression in  
695 the wing disc in response to tissue damage or stress[83]. Further, increased Dilp8 levels  
696 communicate with the brain to inhibit the ecdysone synthesis, thereby slowing growth[83], [131].

697 Consistent with these reports, we found that *Gαq* overexpression decreased the expression of  
698 20E-dependent genes. Moreover, our developmental assay confirms this result as we observed  
699 a delay in larval to pupal transition for flies expressing *Gαq* in the wing disc. This developmental  
700 delay is strikingly similar to that observed when *dilp-8* is overexpressed in the wing disc[83], [84].

701 Studies have shown that different *Gα* subtypes such as *Gαo*, *Gα<sub>16</sub>* induce mitogenic activity  
702 through activation of JAK/STAT signaling[38], [132], [133]. For instance, the constitutively active  
703 form of *Gαo* induces activation of STAT3 in NIH-3T3 cells and subsequent cell  
704 transformation[133, p. 3]. In addition, Heasley et al. have shown that expression of the

705 constitutively active form of *Gα<sub>16</sub>* inhibits growth and activates JNK signaling in small lung  
706 carcinoma cell lines (SLC)[39]. By contrast, sustained activation of Gαq signaling induces cell  
707 death in GABAergic medium spiny neurons via activation of JNK signaling[134]. These studies

708 indicate the active role of JAK/STAT signaling in Gαq mediated growth and apoptosis.

709 Cumulatively, our results demonstrate that *Gαq* overexpression regulates JNK signaling genes,  
710 which might possibly regulate apoptosis and proliferation, thereby affecting the final wing size.

711 While many studies have investigated the mechanisms underlying the transmission of proliferative

712 signals through GPCR stimulation *in vitro*, further research is required to elucidate how G proteins  
713 encode mitogenic signals *in vivo*[14], [135].

714

715 Next, our RNA seq analysis of *Gaq*<sup>RNAi</sup> indicates that the nuclear hormone receptor-related genes  
716 were affected (**Fig. 6E & 7B**). Our analysis indicated that DNA replication was enriched among  
717 the upregulated genes. Moreover, the downregulated genes were primarily involved in biological  
718 processes related to cuticle development, molting cycle, taxis, and transmembrane transport.  
719 Interestingly, we observed downregulation in genes mediating ecdysone response (**Fig. 6E**),  
720 thereby resulting in the downregulation of ecdysone-induced genes (**Additional File 1, Fig. S13**  
721 **and Fig. S15**). Specifically, the *Ecdysone-induced genes 71E* family (*Eig71E*), which are  
722 regulated by Ecdysone-induced primary response genes, were downregulated (**Additional File**  
723 **1, Fig. S13, Additional File 3**). A further finding was an increase in Dilp-8 levels, which may  
724 explain the inhibition of genes related to ecdysone signaling. Our developmental assay further  
725 confirmed this as we observed an approximate twelve-hour delay in the pupariation of flies  
726 expressing *Gaq*<sup>RNAi</sup>. Interestingly, we identified a similar trend in gene expression profile for both  
727 *Gaq*<sup>RNAi</sup> and *Gaq* overexpression conditions. However, the extent of gene activation or  
728 suppression is statistically less in *Gaq*<sup>RNAi</sup> when compared to the *Gaq* overexpression. These  
729 results suggest a common compensatory mechanism in a cell operating in response to  
730 dysregulation of *Gaq* homeostasis. Moreover, our trichome analysis of *Gaq*<sup>RNAi</sup> showed a  
731 reduction in the cell number, thereby indicating that the reduction in the wing disc growth is caused  
732 by the lack of calcium signaling. Collectively, our RNA seq results demonstrated that disruption  
733 to *Gaq* homeostasis reduced growth and increased developmental time. Further, the increased  
734 developmental time caused by *Gaq* overexpression occurs through Ca<sup>2+</sup> activity. Significantly, we  
735 observed that inhibition of Ca<sup>2+</sup> signaling through Ip<sub>3</sub>R knockdown rescues the development delay  
736 caused by *Gaq* overexpression. However, the knockdown of Ip<sub>3</sub>R along with *Gaq* overexpression

737 reduced wing size, thereby implying that  $\text{Ca}^{2+}$  signaling promotes proliferation in the wing disc by  
738 regulating the developmental time.

739

740 Importantly, our RNA seq data revealed a reduction in the expression of serine protease inhibitors,  
741 thus resulting in an increase in the expression of serine proteases, including Jonah genes, which  
742 are key proteolytic enzymes (**Additional File 2**). Moreover, serine protease cascades are known  
743 to elicit immune responses by inducing proteolytic cleavage of *spz*[92]. Our enrichment analysis  
744 investigating the core signaling pathways indicated that the nuclear hormone receptor, Toll  
745 signaling, and JAK/STAT were significantly affected in the *Gaq* overexpression condition. This  
746 result confirms that disruption to *Gaq* homeostasis parallels signals related to tissue damage  
747 response, thereby eliciting stress and immune response. Several studies have reported the role  
748 of G proteins in mediating immune response and autoimmunity[136]–[138]. For example, Zhu. et  
749 al. reported that XLG2, a functional  $G\alpha$  protein, positively regulates immune response to provide  
750 disease resistance in plants[139]. Interestingly, studies have shown that the activation of immune  
751 signaling occurs at the expense of growth[89]. Further investigations are needed to explore the  
752 crosstalk mechanisms between *Gaq* and immune regulation during organ growth.

753

754 Of note, our transcriptomic analysis of *Gaq* OE shows a strong upregulation in the orphan GPCR  
755 Methuselah-like 8 (*mthl8*) with a striking  $\log_2$  fold change of 11.5 (**Additional File 4**). *Mthl-8* has  
756 been shown to impact wing expansion[140]. In addition, the family of Methuselah genes is known  
757 to be involved in longevity and stress resistance[141]. Recent work in Lepidoptera suggests that  
758 GPCRs with homology to the Methuselah family of receptors may play important, unresolved roles  
759 in mediating the key hormone ecdysone[63], [142]. Importantly, it has been shown that *mthl-8* is  
760 a potential target of the JNK signaling in the *Drosophila* eye disc[143]. Collectively, our results  
761 imply a crosstalk between *Gaq* and GPCRs such as *mthl-8*. Further investigations are needed to  
762 elucidate the role of G proteins in regulating the expression of signal transducers such as GPCRs.

763 Moreover, studies are needed to clarify the subcellular location and functional activity of Gαq and  
764 related GPCRs. Recently, GPCRs have been found to be active not only in the outer cell  
765 membrane but associated with the inner membranes of organelles within the cell[144], [145]. Also,  
766 further investigation is needed to map out key molecular players activating Gαq-mediated ICWs  
767 *in vivo*. For instance, recent studies have indicated that growth-blocking peptide (Gbps) binds to  
768 Mth10 receptors and triggers Gαq mediated ICWs in the *Drosophila* wing disc[48]. Understanding  
769 the growth regulatory mechanisms acting through G-proteins may lead to broadly applicable  
770 insights into cancer therapeutics and drug development[141], [146].

771

## 772 **Conclusions**

773 In summary, our study has decoded the downstream impacts of perturbing *Gαq* expression. Gαq  
774 activity is sufficient to stimulate intercellular calcium waves and is a key regulator of Ca<sup>2+</sup> activity  
775 during development and wound healing. Our study characterized the multiple growth modules  
776 impacted by *Gαq* perturbations and their roles in facilitating organ growth control during  
777 development. An intriguing finding is that there exist similar changes in gene expression for  
778 *Gαq*<sup>RNAi</sup> and *Gαq* OE conditions, which suggests that homeostasis of *Gαq* expression is  
779 necessary for proper growth and development. Overall, our findings from this work suggest that  
780 a central functional role of Gαq-mediated Ca<sup>2+</sup> signaling is to coordinate the growth status of  
781 peripheral organs to the brain by upregulating Dilp8, thereby mediating the “crosstalk” between  
782 developing organs and “the control center” of the brain (**Fig. 6E**). Thus, tissue wide Ca<sup>2+</sup> waves  
783 generated by Gαq activity coordinates the response to wounding or other stressors to extend the  
784 developmental time and reduce growth.

785



## 786 **Materials and methods**

787

### 788 **Fly stocks**

789 *Drosophila* stocks were grown on standard laboratory cornmeal food. All crosses were set up at  
790 25°C. The following stocks were used for the experiment: C765-Gal4 y[1] w[\*];  
791 P{w[+mW.hs]=GawB}C-765 (BDSC:36523), nubbin-GAL4, UAS-Dcr-2 (BDSC:25754), MS1096-  
792 GAL4, UAS-Dcr-2 (BDSC:25706), UAS-Gαq (BDSC:30734), UAS-Galpa49B RNAi  
793 (BDSC:36775), w; Sco/CyO; Dr/TM6B, Tb (gift of Carthew Lab), w; Sco/CyO; MKRS/TM6B, Tb  
794 (gift from Carthew lab), w; UAS-Gαq/CyO; C765-Gal4/TM6B, Tb (generated in this study), w; UAS-  
795 Gαq, C765-Gal4/Cyo-TM6B, Tb (generated in this study), UAS-Itpr RNAi (BDSC:25937), UAS-p35  
796 (BDSC #6298), UAS-Plc21C RNAi (BDSC: 33719), UAS-si RNAi (BDSC:32906), UAS-Rya-r44F  
797 RNAi (BDSC:31540), nub-GAL4, UAS-GCaMP6f/CyO (recombinant line made in Zartman Lab).

798

### 799 **Immunohistochemistry and imaging of fixed samples**

800 The imaginal wing discs were dissected in Phosphate Buffered Saline (PBS) (#P5368, Millipore-  
801 Sigma). Following the dissection of the wing discs, they were fixed in 4% PFA for 20 minutes at  
802 room temperature, followed by three 10-minute washes in PBT (0.03% Triton X-100 (#T9284,  
803 Sigma-Aldrich) in PBS). Next, discs were blocked in 5% Normal Goat Serum (NGS)  
804 (#NC9660079; Jackson Immuno Research Laboratories, West Grove, PA) for 30 minutes and  
805 followed by overnight incubation with primary antibodies at 4°C. The following primary antibodies  
806 were used: PH3 (#9701S, Cell Signaling), diluted to 1:800 in 5% NGS, and DCP-1 (#9578S; Cell  
807 Signaling), diluted to 1:100 in 5% NGS. Incubation of the primary antibodies was followed by three  
808 15-minute washes with PBT and subsequent incubation with Alexa Fluor-conjugated secondary  
809 antibodies (1:500 in 5%NGS) and DAPI (# D9542; Millipore Sigma) (1:1000) for 2-3 hours at room  
810 temperature in the dark. After this, wing discs were washed with PBT overnight at 4°C, followed

811 by two 15-minute washes at room temperature. Discs were next mounted in Vectashield (# H-  
812 1000, Vector Laboratories) on a 24x66 mm coverslip and covered by a 22x22 coverslip, and  
813 sealed with clear nail polish by the sides. Images of mounted wing discs were obtained using a  
814 Nikon Eclipse Ti confocal microscope with a Yokogawa spinning disk (Tokyo, Japan) at a  
815 magnification of 40x (oil objective, NA 1.30).

816

817

### 818 **In vivo imaging setup**

819 Third instar wandering larvae were collected and rinsed in deionized water prior to imaging. A  
820 coverslip was used to image the larvae after they had been dried and adhered to a cover with  
821 Scotch tape. The larvae were attached with their spiracles facing the coverslip to align the wing  
822 discs toward the microscope. An EVOS FL Auto microscope was used to image the larvae at a  
823 magnification of 20x for 20 minutes. The images were taken every 15 seconds.

824

### 825 **RNA extraction**

826 RNA was isolated using RNeasy Mini Kit (#74104; QIAGEN), using a standard procedure with  
827 DNase on column digestion (RNase-free DNase set. #79254, QIAGEN). RNA was eluted in  
828 RNase DNase-free water provided by the RNeasy Mini Kit. Samples from multiple days of  
829 dissection were pooled such that each biological replica would have 79 WDs. To assess the RNA  
830 quantity and quality, we performed QC using Qubit and Agilent Bioanalyzer and pooled samples  
831 from multiple days of RNA isolation to achieve at least 50ng of RNA per sample or higher.

832

### 833 **Sequencing**

834 RNASeq libraries were prepared and sequenced across one lane of an Illumina NextSeq v2.5  
835 (Mid Output 150 cycle) flow cell. Each library was prepared using the NEBNext Ultra II Directional

836 RNA. Library Prep kit and the NEB mRNA Magnetic Isolation Module. We performed QC and  
837 quantitation on the library pool using the Qubit dsDNA Agilent Bioanalyzer DNA. High Sensitivity  
838 Chip, and Kapa Illumina Library Quantification qPCR assays. The sequencing form was paired-  
839 end 75bp. Base calling was done by Illumina Real Time Analysis (RTA) v2 software.

840

#### 841 **Processing of sequencing data**

842 We trimmed the raw sequences of adapters with Trimmomatic version 0.39[147] and assessed  
843 for quality with FastQC v 0.11.8[148]. Trimmed sequences were aligned to the *Drosophila*  
844 genome, and Ensembl built *Drosophila melanogaster*.BDGP6.32.104.gtf, Berkeley *Drosophila*  
845 Genome Project (BDGP, Release 6, Aug. 2014), using Dmel\_Release\_6.01 version annotations  
846 and HISAT2 version 2.1.0[149]. SAMtools version 1.9 was used to sort the corresponding  
847 alignments[150]. Read counts were generated with HTSeq-count version  
848 0.11.2[151]. Subsequent statistics were completed in R (R Core Team, 2014), implementing the  
849 edgeR library version 3.36.0[152]–[155]. Using the Ensembl version of BioMart, Gene names  
850 and GO terms were identified[156].

851

#### 852 **Quantification of adult wings and statistics**

853 Using ImageJ, we measured the total area of the wings. The wing margin was traced by following  
854 veins L1 and L5, and the hinge region was excluded from the size analysis. All statistical analyses  
855 were performed using R and Excel. Student t-tests were performed to assess the statistical  
856 significance of our comparisons. P-value, standard deviation, and sample size (n) are provided in  
857 each figure and legend.

858

859

860

## 861 **Developmental timing assay**

862 Virgins were 1-3 days old when mated with males. Crosses were mated 24 h prior and transferred  
863 to a vial for egg collection. Fertilized eggs from each cross were collected for eight hours in a  
864 fresh vial with corn meal food and then transferred to a new vial. After egg laying, pupae were  
865 manually scored in 12-hour intervals for ten days. For C765>Gaq + >RyR<sup>RNAi</sup> and C765>Gaq +  
866 >Ip<sub>3</sub>R<sup>RNAi</sup>, pupae were manually counted in 24-hour intervals for approximately 6 to 7 days.

867

## 868 **Acknowledgments**

869 The work in this paper was supported by NIH Grant R35GM124935, NSF Award CBET-1553826,  
870 and EMBRIO Institute, contract #2120200, a National Science Foundation (NSF) Biology  
871 Integration Institute. Notre Dame Genomics & Bioinformatics Core Facility provided services  
872 related to RNA sequencing. The authors would also like to thank members of the Zartman lab for  
873 helpful discussions. We would like to thank Giorgia Giordano for her help in the project.

874

## 875 **Author contributions**

876 VVK performed experiments, analyzed data, and wrote the paper. DKS conceived the study,  
877 performed experiments, analyzed data, and wrote the paper. MU performed experiments,  
878 analyzed data, and wrote the paper. DG and NK performed experiments and analyzed data. JL  
879 performed the RNA seq analysis. JJZ conceived the study, analyzed data, wrote the paper, and  
880 supervised the study.

881

## 882 **Data Availability**

883 Differential gene expression analysis data obtained from our RNA sequencing study is  
884 available in Additional File 3 and Additional File 4. The RNA sequencing raw data and the

885 wing image data obtained during the current study is available from the corresponding  
886 author on reasonable request.

887

888 **Conflict of interests**

889 The authors declare no conflicts of interest.

890

891

892

893

894

895 **References**

- 896 [1] I. K. Hariharan, "Organ Size Control: Lessons from *Drosophila*," *Developmental Cell*, vol.  
897 34, no. 3, pp. 255–265, Aug. 2015, doi: 10.1016/j.devcel.2015.07.012.
- 898 [2] E. Hafen and H. Stocker, "How Are the Sizes of Cells, Organs, and Bodies Controlled?,"  
899 *PLoS Biol*, vol. 1, no. 3, p. e86, Dec. 2003, doi: 10.1371/journal.pbio.0000086.
- 900 [3] I. Conlon and M. Raff, "Size Control in Animal Development," *Cell*, vol. 96, no. 2, pp. 235–  
901 244, Jan. 1999, doi: 10.1016/S0092-8674(00)80563-2.
- 902 [4] R. M. Neto-Silva, B. S. Wells, and L. A. Johnston, "Mechanisms of growth and  
903 homeostasis in the *Drosophila* wing," *Annu Rev Cell Dev Biol*, vol. 25, pp. 197–220, 2009,  
904 doi: 10.1146/annurev.cellbio.24.110707.175242.
- 905 [5] N. Arora *et al.*, "A process engineering approach to increase organoid yield,"  
906 *Development*, p. dev.142919, Jan. 2017, doi: 10.1242/dev.142919.
- 907 [6] P. J. Bryant and P. Simpson, "Intrinsic and Extrinsic Control of Growth in Developing  
908 Organs," *The Quarterly Review of Biology*, vol. 59, no. 4, pp. 387–415, Dec. 1984, doi:  
909 10.1086/414040.
- 910 [7] A. Roselló-Díez and A. L. Joyner, "Regulation of Long Bone Growth in Vertebrates; It Is  
911 Time to Catch Up," *Endocrine Reviews*, vol. 36, no. 6, pp. 646–680, Dec. 2015, doi:  
912 10.1210/er.2015-1048.
- 913 [8] R. Lappano and M. Maggiolini, "GPCRs and cancer," *Acta Pharmacol Sin*, vol. 33, no. 3,  
914 Art. no. 3, Mar. 2012, doi: 10.1038/aps.2011.183.
- 915 [9] A. G. Gilman, "G Proteins: Transducers of Receptor-Generated Signals," *Annual Review*  
916 *of Biochemistry*, vol. 56, no. 1, pp. 615–649, 1987, doi:  
917 10.1146/annurev.bi.56.070187.003151.
- 918 [10] M. I. Simon, M. P. Strathmann, and N. Gautam, "Diversity of G Proteins in Signal  
919 Transduction," *Science*, vol. 252, no. 5007, pp. 802–808, May 1991, doi:  
920 10.1126/science.1902986.

- 921 [11] J. R. Hepler and A. G. Gilman, "G proteins," *Trends in Biochemical Sciences*, vol. 17, no.  
922 10, pp. 383–387, Oct. 1992, doi: 10.1016/0968-0004(92)90005-T.
- 923 [12] V. Radhika and N. Dhanasekaran, "Transforming G proteins," *Oncogene*, vol. 20, no. 13,  
924 pp. 1607–1614, Mar. 2001, doi: 10.1038/sj.onc.1204274.
- 925 [13] T. Imamura *et al.*, "G Alpha-q/11 Protein Plays a Key Role in Insulin-Induced Glucose  
926 Transport in 3T3-L1 Adipocytes," *Molecular and Cellular Biology*, vol. 19, no. 10, pp.  
927 6765–6774, Oct. 1999, doi: 10.1128/MCB.19.10.6765.
- 928 [14] K. B. Hubbard and J. R. Hepler, "Cell signalling diversity of the Gq $\alpha$  family of  
929 heterotrimeric G proteins," *Cellular Signalling*, vol. 18, no. 2, pp. 135–150, Feb. 2006, doi:  
930 10.1016/j.cellsig.2005.08.004.
- 931 [15] N. Dhanasekaran, S.-T. Tsim, J. M. Dermott, and D. Onesime, "Regulation of cell  
932 proliferation by G proteins," *Oncogene*, vol. 17, no. 11, Art. no. 11, Sep. 1998, doi:  
933 10.1038/sj.onc.1202242.
- 934 [16] C. C. Malbon, "G proteins in development," *Nat Rev Mol Cell Biol*, vol. 6, no. 9, Art. no. 9,  
935 Sep. 2005, doi: 10.1038/nrm1716.
- 936 [17] S. G. F. Rasmussen *et al.*, "Crystal structure of the  $\beta$ 2 adrenergic receptor–Gs protein  
937 complex," *Nature*, vol. 477, no. 7366, Art. no. 7366, Sep. 2011, doi:  
938 10.1038/nature10361.
- 939 [18] T. M. Wilkie, P. A. Scherle, M. P. Strathmann, V. Z. Slepak, and M. I. Simon,  
940 "Characterization of G-protein alpha subunits in the Gq class: expression in murine  
941 tissues and in stromal and hematopoietic cell lines.," *Proceedings of the National*  
942 *Academy of Sciences*, vol. 88, no. 22, pp. 10049–10053, Nov. 1991, doi:  
943 10.1073/pnas.88.22.10049.
- 944 [19] S. G. Rhee, "Regulation of Phosphoinositide-Specific Phospholipase C," *Annual Review*  
945 *of Biochemistry*, vol. 70, no. 1, pp. 281–312, 2001, doi:  
946 10.1146/annurev.biochem.70.1.281.

- 947 [20] U. Kikkawa, A. Kishimoto, and Y. Nishizuka, "The Protein Kinase C Family: Heterogeneity  
948 and Its Implications," *Annual Review of Biochemistry*, vol. 58, no. 1, pp. 31–44, 1989, doi:  
949 10.1146/annurev.bi.58.070189.000335.
- 950 [21] L. Jackson, A. Qifti, K. M. Pearce, and S. Scarlata, "Regulation of bifunctional proteins in  
951 cells: Lessons from the phospholipase C $\beta$ /G protein pathway," *Protein Science*, vol. 29,  
952 no. 6, pp. 1258–1268, 2020, doi: 10.1002/pro.3809.
- 953 [22] D. Kamato *et al.*, "Structure, Function, Pharmacology, and Therapeutic Potential of the G  
954 Protein, G $\alpha$ /q,11," *Frontiers in Cardiovascular Medicine*, vol. 2, 2015, Accessed: Aug. 24,  
955 2022. [Online]. Available: <https://www.frontiersin.org/articles/10.3389/fcvm.2015.00014>
- 956 [23] W. D. Singer, H. A. Brown, and P. C. Sternweis, "Regulation of Eukaryotic  
957 Phosphatidylinositol-Specific Phospholipase C and Phospholipase D," *Annual Review of*  
958 *Biochemistry*, vol. 66, no. 1, pp. 475–509, 1997, doi: 10.1146/annurev.biochem.66.1.475.
- 959 [24] T. K. Harden, G. L. Waldo, S. N. Hicks, and J. Sondek, "Mechanism of Activation and  
960 Inactivation of Gq/Phospholipase C- $\beta$  Signaling Nodes," *Chem. Rev.*, vol. 111, no. 10, pp.  
961 6120–6129, Oct. 2011, doi: 10.1021/cr200209p.
- 962 [25] P. A. Brodskiy *et al.*, "Decoding Calcium Signaling Dynamics during *Drosophila* Wing Disc  
963 Development," *Biophysical Journal*, vol. 116, no. 4, Art. no. 4, Feb. 2019, doi:  
964 10.1016/j.bpj.2019.01.007.
- 965 [26] P. A. Brodskiy and J. J. Zartman, "Calcium as a signal integrator in developing epithelial  
966 tissues," *Physical biology*, vol. 15, no. 5, Art. no. 5, 2018.
- 967 [27] P. A. Galvin-Parton, X. Chen, C. M. Moxham, and C. C. Malbon, "Induction of G $\alpha$ q-  
968 specific Antisense RNA in Vivo Causes Increased Body Mass and Hyperadiposity \*,"  
969 *Journal of Biological Chemistry*, vol. 272, no. 7, pp. 4335–4341, Feb. 1997, doi:  
970 10.1074/jbc.272.7.4335.



- 971 [28] J. Baumbach, Y. Xu, P. Hehlert, and R. P. Kühnlein, “Gαq, Gγ1 and Plc21C control  
972 *Drosophila* body fat storage,” *Journal of Genetics and Genomics*, vol. 41, no. 5, Art. no. 5,  
973 2014.
- 974 [29] S. Offermanns, L.-P. Zhao, A. Gohla, I. Sarosi, M. I. Simon, and T. M. Wilkie, “Embryonic  
975 cardiomyocyte hypoplasia and craniofacial defects in Gαq. Gα11-mutant mice,” *The*  
976 *EMBO Journal*, vol. 17, no. 15, pp. 4304–4312, Aug. 1998, doi:  
977 10.1093/emboj/17.15.4304.
- 978 [30] S. Offermanns *et al.*, “Impaired motor coordination and persistent multiple climbing fiber  
979 innervation of cerebellar Purkinje cells in mice lacking Galphaq,” *Proc Natl Acad Sci U S*  
980 *A*, vol. 94, no. 25, pp. 14089–14094, Dec. 1997, doi: 10.1073/pnas.94.25.14089.
- 981 [31] “Loss of Gq/11 family G proteins in the nervous system causes pituitary somatotroph  
982 hypoplasia and dwarfism in mice,” 2005.
- 983 [32] C. D. Van Raamsdonk, K. R. Fitch, H. Fuchs, M. H. de Angelis, and G. S. Barsh, “Effects  
984 of G-protein mutations on skin color,” *Nat Genet*, vol. 36, no. 9, Art. no. 9, Sep. 2004, doi:  
985 10.1038/ng1412.
- 986 [33] M. D. Vivo, J. Chen, J. Codina, and R. Iyengar, “Enhanced phospholipase C stimulation  
987 and transformation in NIH-3T3 cells expressing Q209LGq-alpha-subunits.,” *Journal of*  
988 *Biological Chemistry*, vol. 267, no. 26, pp. 18263–18266, Sep. 1992, doi: 10.1016/S0021-  
989 9258(19)36952-2.
- 990 [34] M. De Vivo and R. Iyengar, “Activated Gq-alpha potentiates platelet-derived growth  
991 factor-stimulated mitogenesis in confluent cell cultures.,” *Journal of Biological Chemistry*,  
992 vol. 269, no. 31, pp. 19671–19674, Aug. 1994, doi: 10.1016/S0021-9258(17)32070-7.
- 993 [35] H. Zeng, D. Zhao, S. Yang, K. Datta, and D. Mukhopadhyay, “Heterotrimeric Gαq/Gα11  
994 Proteins Function Upstream of Vascular Endothelial Growth Factor (VEGF) Receptor-2  
995 (KDR) Phosphorylation in Vascular Permeability Factor/VEGF Signaling\*,” *Journal of*

- 996 *Biological Chemistry*, vol. 278, no. 23, pp. 20738–20745, Jun. 2003, doi:  
997 10.1074/jbc.M209712200.
- 998 [36] R. D. Peavy, M. S. S. Chang, E. Sanders-Bush, and P. J. Conn, “Metabotropic Glutamate  
999 Receptor 5-Induced Phosphorylation of Extracellular Signal-Regulated Kinase in  
1000 Astrocytes Depends on Transactivation of the Epidermal Growth Factor Receptor,” *J.*  
1001 *Neurosci.*, vol. 21, no. 24, pp. 9619–9628, Dec. 2001, doi: 10.1523/JNEUROSCI.21-24-  
1002 09619.2001.
- 1003 [37] J. Yamauchi, M. Nagao, Y. Kaziro, and H. Itoh, “Activation of p38 Mitogen-activated  
1004 Protein Kinase by Signaling through G Protein-coupled Receptors: INVOLVEMENT OF  
1005 G $\beta\gamma$  AND G $\alpha_q/11$  SUBUNITS\*,” *Journal of Biological Chemistry*, vol. 272, no. 44, pp.  
1006 27771–27777, Oct. 1997, doi: 10.1074/jbc.272.44.27771.
- 1007 [38] R. K. H. Lo, H. Cheung, and Y. H. Wong, “Constitutively Active G $\alpha_{16}$  Stimulates STAT3  
1008 via a c-Src/JAK- and ERK-dependent Mechanism\*,” *Journal of Biological Chemistry*, vol.  
1009 278, no. 52, pp. 52154–52165, Dec. 2003, doi: 10.1074/jbc.M307299200.
- 1010 [39] L. E. Heasley *et al.*, “Discordant Signal Transduction and Growth Inhibition of Small Cell  
1011 Lung Carcinomas Induced by Expression of GTPase-deficient G $\alpha_{16}(*),$ ” *Journal of*  
1012 *Biological Chemistry*, vol. 271, no. 1, pp. 349–354, Jan. 1996, doi: 10.1074/jbc.271.1.349.
- 1013 [40] C. García-Hoz, G. Sánchez-Fernández, M. T. Díaz-Meco, J. Moscat, F. Mayor, and C.  
1014 Ribas, “G $\alpha_q$  Acts as an Adaptor Protein in Protein Kinase C $\zeta$  (PKC $\zeta$ )-mediated ERK5  
1015 Activation by G Protein-coupled Receptors (GPCR) $\blacklozenge$ ,” *J Biol Chem*, vol. 285, no. 18, pp.  
1016 13480–13489, Apr. 2010, doi: 10.1074/jbc.M109.098699.
- 1017 [41] C. D. Van Raamsdonk *et al.*, “Frequent somatic mutations of GNAQ in uveal melanoma  
1018 and blue naevi,” *Nature*, vol. 457, no. 7229, Art. no. 7229, Jan. 2009, doi:  
1019 10.1038/nature07586.

- 1020 [42] C. D. Van Raamsdonk *et al.*, “Mutations in GNA11 in Uveal Melanoma,” *New England*  
1021 *Journal of Medicine*, vol. 363, no. 23, pp. 2191–2199, Dec. 2010, doi:  
1022 10.1056/NEJMoa1000584.
- 1023 [43] G. Kalinec, A. J. Nazarali, S. Hermouet, N. Xu, and J. S. Gutkind, “Mutated alpha subunit  
1024 of the Gq protein induces malignant transformation in NIH 3T3 cells,” *Molecular and*  
1025 *Cellular Biology*, vol. 12, no. 10, pp. 4687–4693, Oct. 1992, doi:  
1026 10.1128/mcb.12.10.4687-4693.1992.
- 1027 [44] N. X. Qian, M. Russell, A. M. Buhl, and G. L. Johnson, “Expression of GTPase-deficient  
1028 G alpha 16 inhibits Swiss 3T3 cell growth,” *Journal of Biological Chemistry*, vol. 269, no.  
1029 26, pp. 17417–17423, Jul. 1994, doi: 10.1016/S0021-9258(17)32455-9.
- 1030 [45] N.-X. Qian, S. Winitz, and G. L. Johnson, “Epitope-tagged Gq  $\alpha$  subunits: Expression of  
1031 GTPase-deficient  $\alpha$  subunits persistently stimulates phosphatidylinositol-specific  
1032 phospholipase C but not mitogen-activated protein kinase activity regulated by the M1  
1033 muscarinic acetylcholine receptor,” *Proc. Natl. Acad. Sci. USA*, p. 5, 1993.
- 1034 [46] D. K. Soundarrajan, F. J. Huizar, R. Paravitorghabeh, T. Robinett, and J. J. Zartman,  
1035 “From spikes to intercellular waves: Tuning intercellular calcium signaling dynamics  
1036 modulates organ size control,” *PLOS Computational Biology*, vol. 17, no. 11, p.  
1037 e1009543, Nov. 2021, doi: 10.1371/journal.pcbi.1009543.
- 1038 [47] E. K. Shannon *et al.*, “Multiple Mechanisms Drive Calcium Signal Dynamics around  
1039 Laser-Induced Epithelial Wounds,” *Biophysical Journal*, vol. 113, no. 7, pp. 1623–1635,  
1040 Oct. 2017, doi: 10.1016/j.bpj.2017.07.022.
- 1041 [48] J. T. O’Connor *et al.*, “Proteolytic activation of Growth-blocking peptides triggers calcium  
1042 responses through the GPCR Mthl10 during epithelial wound detection,” *Developmental*  
1043 *Cell*, vol. 56, no. 15, pp. 2160-2175.e5, Aug. 2021, doi: 10.1016/j.devcel.2021.06.020.

- 1044 [49] A. Buchmann, M. Alber, and J. J. Zartman, "Sizing it up: the mechanical feedback  
1045 hypothesis of organ growth regulation," *Semin Cell Dev Biol*, vol. 35, pp. 73–81, Nov.  
1046 2014, doi: 10.1016/j.semcdb.2014.06.018.
- 1047 [50] M. C. Diaz de la Loza and B. J. Thompson, "Forces shaping the Drosophila wing," *Mech*  
1048 *Dev*, vol. 144, no. Pt A, pp. 23–32, Apr. 2017, doi: 10.1016/j.mod.2016.10.003.
- 1049 [51] T. Chorna and G. Hasan, "The genetics of calcium signaling in Drosophila melanogaster,"  
1050 *Biochim Biophys Acta*, vol. 1820, no. 8, pp. 1269–1282, Aug. 2012, doi:  
1051 10.1016/j.bbagen.2011.11.002.
- 1052 [52] B. K. Tripathi and K. D. Irvine, "The wing imaginal disc," *Genetics*, p. iyac020, Feb. 2022,  
1053 doi: 10.1093/genetics/iyac020.
- 1054 [53] J. B. Duffy, "GAL4 system in Drosophila: a fly geneticist's Swiss army knife," *Genesis*, vol.  
1055 34, no. 1–2, pp. 1–15, Oct. 2002, doi: 10.1002/gene.10150.
- 1056 [54] E. N. Howe *et al.*, "Rab11b-mediated integrin recycling promotes brain metastatic  
1057 adaptation and outgrowth," *Nat Commun*, vol. 11, no. 1, Art. no. 1, Jun. 2020, doi:  
1058 10.1038/s41467-020-16832-2.
- 1059 [55] K. X. Rodriguez *et al.*, "Combined Scaffold Evaluation and Systems-Level Transcriptome-  
1060 Based Analysis for Accelerated Lead Optimization Reveals Ribosomal Targeting  
1061 Spirooxindole Cyclopropanes," *ChemMedChem*, vol. 14, no. 18, pp. 1653–1661, 2019,  
1062 doi: 10.1002/cmdc.201900266.
- 1063 [56] M. Gladstone and T. T. Su, "Chemical genetics and drug screening in Drosophila cancer  
1064 models," *J Genet Genomics*, vol. 38, no. 10, pp. 497–504, Oct. 2011, doi:  
1065 10.1016/j.jgg.2011.09.003.
- 1066 [57] K. Basler and G. Struhl, "Compartment boundaries and the control of Drosophila limb  
1067 pattern by hedgehog protein," *Nature*, vol. 368, no. 6468, Art. no. 6468, Mar. 1994, doi:  
1068 10.1038/368208a0.

- 1069 [58] M. Strigini and S. M. Cohen, "Wingless gradient formation in the *Drosophila* wing," *Curr*  
1070 *Biol*, vol. 10, no. 6, pp. 293–300, Mar. 2000, doi: 10.1016/s0960-9822(00)00378-x.
- 1071 [59] D. Nellen, R. Burke, G. Struhl, and K. Basler, "Direct and Long-Range Action of a DPP  
1072 Morphogen Gradient," *Cell*, vol. 85, no. 3, pp. 357–368, May 1996, doi: 10.1016/S0092-  
1073 8674(00)81114-9.
- 1074 [60] A. Ratnaparkhi, S. Banerjee, and G. Hasan, "Altered Levels of Gq Activity Modulate  
1075 Axonal Pathfinding in *Drosophila*," *J. Neurosci.*, vol. 22, no. 11, pp. 4499–4508, Jun. 2002,  
1076 doi: 10.1523/JNEUROSCI.22-11-04499.2002.
- 1077 [61] E.-M. Ha *et al.*, "Regulation of DUOX by the Galphaq-phospholipase Cbeta-Ca<sup>2+</sup>  
1078 pathway in *Drosophila* gut immunity," *Dev Cell*, vol. 16, no. 3, pp. 386–397, Mar. 2009,  
1079 doi: 10.1016/j.devcel.2008.12.015.
- 1080 [62] K. Venkatesh and G. Hasan, "Disruption of the IP3 receptor gene of *Drosophila* affects  
1081 larval metamorphosis and ecdysone release," *Current Biology*, vol. 7, no. 7, pp. 500–509,  
1082 Jul. 1997, doi: 10.1016/S0960-9822(06)00221-1.
- 1083 [63] X.-L. Kang, Y.-X. Li, Y.-L. Li, J.-X. Wang, and X.-F. Zhao, "The homotetramerization of a  
1084 GPCR transmits the 20-hydroxyecdysone signal and increases its entry into cells for  
1085 insect metamorphosis," *Development*, vol. 148, no. 5, p. dev196667, 2021.
- 1086 [64] X.-L. Kang *et al.*, "The steroid hormone 20-hydroxyecdysone binds to dopamine receptor  
1087 to repress lepidopteran insect feeding and promote pupation," *PLOS Genetics*, vol. 15,  
1088 no. 8, p. e1008331, Aug. 2019, doi: 10.1371/journal.pgen.1008331.
- 1089 [65] W. Liu, M.-J. Cai, J.-X. Wang, and X.-F. Zhao, "In a Nongenomic Action, Steroid  
1090 Hormone 20-Hydroxyecdysone Induces Phosphorylation of Cyclin-Dependent Kinase 10  
1091 to Promote Gene Transcription," *Endocrinology*, vol. 155, no. 5, pp. 1738–1750, May  
1092 2014, doi: 10.1210/en.2013-2020.
- 1093 [66] D. P. Srivastava *et al.*, "Rapid, Nongenomic Responses to Ecdysteroids and  
1094 Catecholamines Mediated by a Novel *Drosophila* G-Protein-Coupled Receptor," *J.*

- 1095 *Neurosci.*, vol. 25, no. 26, pp. 6145–6155, Jun. 2005, doi: 10.1523/JNEUROSCI.1005-  
1096 05.2005.
- 1097 [67] P. A. Brodskiy *et al.*, “Decoding Calcium Signaling Dynamics during *Drosophila* Wing Disc  
1098 Development,” *Biophysical Journal*, vol. 116, no. 4, pp. 725–740, Feb. 2019, doi:  
1099 10.1016/j.bpj.2019.01.007.
- 1100 [68] C. K. Mirth, J. W. Truman, and L. M. Riddiford, “The Ecdysone receptor controls the post-  
1101 critical weight switch to nutrition-independent differentiation in *Drosophila* wing imaginal  
1102 discs,” *Development*, vol. 136, no. 14, pp. 2345–2353, Jul. 2009, doi:  
1103 10.1242/dev.032672.
- 1104 [69] J. Capdevila and I. Guerrero, “Targeted expression of the signaling molecule  
1105 decapentaplegic induces pattern duplications and growth alterations in *Drosophila*  
1106 wings.,” *EMBO J*, vol. 13, no. 19, pp. 4459–4468, Oct. 1994.
- 1107 [70] G. Schwank, S. Restrepo, and K. Basler, “Growth regulation by Dpp: an essential role for  
1108 Brinker and a non-essential role for graded signaling levels,” *Development*, vol. 135, no.  
1109 24, pp. 4003–4013, Dec. 2008, doi: 10.1242/dev.025635.
- 1110 [71] F. J. Cifuentes and A. García-Bellido, “Proximo–distal specification in the wing disc of  
1111 *Drosophila* by the nubbin gene,” *PNAS*, vol. 94, no. 21, pp. 11405–11410, Oct. 1997, doi:  
1112 10.1073/pnas.94.21.11405.
- 1113 [72] Y. Emori *et al.*, “*Drosophila* phospholipase C-gamma expressed predominantly in  
1114 blastoderm cells at cellularization and in endodermal cells during later embryonic  
1115 stages.,” *Journal of Biological Chemistry*, vol. 269, no. 30, pp. 19474–19479, Jul. 1994,  
1116 doi: 10.1016/S0021-9258(17)32193-2.
- 1117 [73] M. Vervoort, M. Crozatier, D. Valle, and A. Vincent, “The COE transcription factor Collier  
1118 is a mediator of short-range Hedgehog-induced patterning of the *Drosophila* wing,”  
1119 *Current Biology*, vol. 9, no. 12, pp. 632–639, Jun. 1999, doi: 10.1016/S0960-  
1120 9822(99)80285-1.

- 1121 [74] M. Strigini and S. M. Cohen, "A Hedgehog activity gradient contributes to AP axial  
1122 patterning of the Drosophila wing," *Development*, vol. 124, no. 22, Art. no. 22, Nov. 1997.
- 1123 [75] A. Strasser, L. O'Connor, and V. M. Dixit, "Apoptosis Signaling," *Annual Review of*  
1124 *Biochemistry*, vol. 69, no. 1, pp. 217–245, 2000, doi: 10.1146/annurev.biochem.69.1.217.
- 1125 [76] B. A. Hay, T. Wolff, and G. M. Rubin, "Expression of baculovirus P35 prevents cell death  
1126 in Drosophila," *Development*, vol. 120, no. 8, pp. 2121–2129, Aug. 1994.
- 1127 [77] D. Christesen *et al.*, "Transcriptome Analysis of Drosophila melanogaster Third Instar  
1128 Larval Ring Glands Points to Novel Functions and Uncovers a Cytochrome p450  
1129 Required for Development," *G3 Genes/Genomes/Genetics*, vol. 7, no. 2, pp. 467–479,  
1130 Feb. 2017, doi: 10.1534/g3.116.037333.
- 1131 [78] M. e. Akam and J. r. Carlson, "The detection of Jonah gene transcripts in Drosophila by in  
1132 situ hybridization.," *The EMBO Journal*, vol. 4, no. 1, pp. 155–161, Jan. 1985, doi:  
1133 10.1002/j.1460-2075.1985.tb02330.x.
- 1134 [79] J. Tower, "Heat shock proteins and Drosophila aging," *Experimental Gerontology*, vol. 46,  
1135 no. 5, pp. 355–362, May 2011, doi: 10.1016/j.exger.2010.09.002.
- 1136 [80] H. R. B. Pelham, "Speculations on the functions of the major heat shock and glucose-  
1137 regulated proteins," *Cell*, vol. 46, no. 7, pp. 959–961, Sep. 1986, doi: 10.1016/0092-  
1138 8674(86)90693-8.
- 1139 [81] J. H. Feder, J. M. Rossi, J. Solomon, N. Solomon, and S. Lindquist, "The consequences  
1140 of expressing hsp70 in Drosophila cells at normal temperatures.," *Genes Dev.*, vol. 6, no.  
1141 8, pp. 1402–1413, Aug. 1992, doi: 10.1101/gad.6.8.1402.
- 1142 [82] J. P. Charles, "The regulation of expression of insect cuticle protein genes," *Insect*  
1143 *Biochemistry and Molecular Biology*, vol. 40, no. 3, pp. 205–213, Mar. 2010, doi:  
1144 10.1016/j.ibmb.2009.12.005.

- 1145 [83] A. Garelli, A. M. Gontijo, V. Miguela, E. Caparros, and M. Dominguez, “Imaginal Discs  
1146 Secrete Insulin-Like Peptide 8 to Mediate Plasticity of Growth and Maturation,” *Science*,  
1147 vol. 336, no. 6081, pp. 579–582, May 2012, doi: 10.1126/science.1216735.
- 1148 [84] J. Colombani, D. S. Andersen, and P. Léopold, “Secreted Peptide Dilp8 Coordinates  
1149 Drosophila Tissue Growth with Developmental Timing,” *Science*, vol. 336, no. 6081, pp.  
1150 582–585, May 2012, doi: 10.1126/science.1216689.
- 1151 [85] W. A. Segraves and D. S. Hogness, “The E75 ecdysone-inducible gene responsible for  
1152 the 75B early puff in *Drosophila* encodes two new members of the steroid receptor  
1153 superfamily.,” *Genes Dev.*, vol. 4, no. 2, pp. 204–219, Feb. 1990, doi:  
1154 10.1101/gad.4.2.204.
- 1155 [86] L. G. Wright, T. Chen, C. S. Thummel, and G. M. Guild, “Molecular Characterization of  
1156 the 71E Late Puff in *Drosophila melanogaster* Reveals a Family of Novel Genes,” *Journal*  
1157 *of Molecular Biology*, vol. 255, no. 3, pp. 387–400, Jan. 1996, doi:  
1158 10.1006/jmbi.1996.0032.
- 1159 [87] N. Okamoto *et al.*, “A Membrane Transporter Is Required for Steroid Hormone Uptake in  
1160 *Drosophila*,” *Developmental Cell*, vol. 47, no. 3, pp. 294-305.e7, Nov. 2018, doi:  
1161 10.1016/j.devcel.2018.09.012.
- 1162 [88] A. C. Ghosh, Y. Hu, S. G. Tattikota, Y. Liu, A. Comjean, and N. Perrimon, “Modeling  
1163 exercise using optogenetically contractible *Drosophila* larvae,” *BMC Genomics*, vol. 23,  
1164 no. 1, p. 623, Aug. 2022, doi: 10.1186/s12864-022-08845-6.
- 1165 [89] F. Germani, D. Hain, D. Sternlicht, E. Moreno, and K. Basler, “The Toll pathway inhibits  
1166 tissue growth and regulates cell fitness in an infection-dependent manner,” *eLife*, vol. 7,  
1167 p. e39939, Nov. 2018, doi: 10.7554/eLife.39939.
- 1168 [90] T. Kawasaki and T. Kawai, “Toll-Like Receptor Signaling Pathways,” *Frontiers in*  
1169 *Immunology*, vol. 5, 2014, Accessed: Aug. 15, 2022. [Online]. Available:  
1170 <https://www.frontiersin.org/articles/10.3389/fimmu.2014.00461>



- 1171 [91] L. Alpar, C. Bergantiños, and L. A. Johnston, “Spatially Restricted Regulation of  
1172 Spätzle/Toll Signaling during Cell Competition,” *Developmental Cell*, vol. 46, no. 6, pp.  
1173 706-719.e5, Sep. 2018, doi: 10.1016/j.devcel.2018.08.001.
- 1174 [92] B. Lemaitre and J. Hoffmann, Eds., “The host defense of *Drosophila melanogaster*,”  
1175 *Annual review of immunology*, 2007, doi: 10.1146/annurev.immunol.25.022106.141615.
- 1176 [93] Z. Kambris *et al.*, “*Drosophila* immunity: a large-scale in vivo RNAi screen identifies five  
1177 serine proteases required for Toll activation,” *Curr Biol*, vol. 16, no. 8, pp. 808–813, Apr.  
1178 2006, doi: 10.1016/j.cub.2006.03.020.
- 1179 [94] B. Lemaitre, E. Nicolas, L. Michaut, J.-M. Reichhart, and J. A. Hoffmann, “The  
1180 Dorsoventral Regulatory Gene Cassette *spätzle/Toll/cactus* Controls the Potent  
1181 Antifungal Response in *Drosophila* Adults,” *Cell*, vol. 86, no. 6, pp. 973–983, Sep. 1996,  
1182 doi: 10.1016/S0092-8674(00)80172-5.
- 1183 [95] Y. T. Ip *et al.*, “*Dif*, a dorsal-related gene that mediates an immune response in  
1184 *Drosophila*,” *Cell*, vol. 75, no. 4, pp. 753–763, Nov. 1993, doi: 10.1016/0092-  
1185 8674(93)90495-C.
- 1186 [96] S. W. Roth, M. D. Bitterman, M. J. Birnbaum, and M. L. Bland, “Innate Immune Signaling  
1187 in *Drosophila* Blocks Insulin Signaling by Uncoupling PI(3,4,5)P3 Production and Akt  
1188 Activation,” *Cell Reports*, vol. 22, no. 10, pp. 2550–2556, Mar. 2018, doi:  
1189 10.1016/j.celrep.2018.02.033.
- 1190 [97] M. S. Dionne, L. N. Pham, M. Shirasu-Hiza, and D. S. Schneider, “Akt and foxo  
1191 Dysregulation Contribute to Infection-Induced Wasting in *Drosophila*,” *Current Biology*,  
1192 vol. 16, no. 20, pp. 1977–1985, Oct. 2006, doi: 10.1016/j.cub.2006.08.052.
- 1193 [98] J. R. DiAngelo, M. L. Bland, S. Bambina, S. Cherry, and M. J. Birnbaum, “The immune  
1194 response attenuates growth and nutrient storage in *Drosophila* by reducing insulin  
1195 signaling,” *Proceedings of the National Academy of Sciences*, vol. 106, no. 49, pp.  
1196 20853–20858, Dec. 2009, doi: 10.1073/pnas.0906749106.

- 1197 [99] D. A. Harrison, P. E. McCoon, R. Binari, M. Gilman, and N. Perrimon, “Drosophila  
1198 unpaired encodes a secreted protein that activates the JAK signaling pathway,” *Genes*  
1199 *Dev.*, vol. 12, no. 20, pp. 3252–3263, Oct. 1998, doi: 10.1101/gad.12.20.3252.
- 1200 [100] H. Luo and C. R. Dearolf, “The JAK/STAT pathway and Drosophila development,”  
1201 *BioEssays*, vol. 23, no. 12, pp. 1138–1147, 2001, doi: 10.1002/bies.10016.
- 1202 [101] V. M. Wright, K. L. Vogt, E. Smythe, and M. P. Zeidler, “Differential activities of the  
1203 Drosophila JAK/STAT pathway ligands Upd, Upd2 and Upd3,” *Cellular Signalling*, vol. 23,  
1204 no. 5, pp. 920–927, May 2011, doi: 10.1016/j.cellsig.2011.01.020.
- 1205 [102] M. S. Flaherty *et al.*, “chinmo Is a Functional Effector of the JAK/STAT Pathway that  
1206 Regulates Eye Development, Tumor Formation, and Stem Cell Self-Renewal in  
1207 Drosophila,” *Developmental Cell*, vol. 18, no. 4, pp. 556–568, Apr. 2010, doi:  
1208 10.1016/j.devcel.2010.02.006.
- 1209 [103] T. Katsuyama, F. Comoglio, M. Seimiya, E. Cabuy, and R. Paro, “During Drosophila disc  
1210 regeneration, JAK/STAT coordinates cell proliferation with Dilp8-mediated developmental  
1211 delay,” *Proceedings of the National Academy of Sciences*, vol. 112, no. 18, pp. E2327–  
1212 E2336, May 2015, doi: 10.1073/pnas.1423074112.
- 1213 [104] M. Li, S. Sun, J. Priest, X. Bi, and Y. Fan, “Characterization of TNF-induced cell death in  
1214 Drosophila reveals caspase- and JNK-dependent necrosis and its role in tumor  
1215 suppression,” *Cell Death Dis*, vol. 10, no. 8, Art. no. 8, Aug. 2019, doi: 10.1038/s41419-  
1216 019-1862-0.
- 1217 [105] J. E. La Marca and H. E. Richardson, “Two-Faced: Roles of JNK Signalling During  
1218 Tumourigenesis in the Drosophila Model,” *Frontiers in Cell and Developmental Biology*,  
1219 vol. 8, 2020, Accessed: Nov. 28, 2022. [Online]. Available:  
1220 <https://www.frontiersin.org/articles/10.3389/fcell.2020.00042>
- 1221 [106] G. Lavorgna, F. D. Karim, C. S. Thummel, and C. Wu, “Potential role for a FTZ-F1 steroid  
1222 receptor superfamily member in the control of Drosophila metamorphosis.” *Proceedings*

- 1223 *of the National Academy of Sciences*, vol. 90, no. 7, pp. 3004–3008, Apr. 1993, doi:  
1224 10.1073/pnas.90.7.3004.
- 1225 [107] M. Schubiger, A. A. Wade, G. E. Carney, J. W. Truman, and M. Bender, “Drosophila EcR-  
1226 B ecdysone receptor isoforms are required for larval molting and for neuron remodeling  
1227 during metamorphosis,” *Development*, vol. 125, no. 11, pp. 2053–2062, Jun. 1998, doi:  
1228 10.1242/dev.125.11.2053.
- 1229 [108] W. S. Talbot, E. A. Swyryd, and D. S. Hogness, “Drosophila tissues with different  
1230 metamorphic responses to ecdysone express different ecdysone receptor isoforms,” *Cell*,  
1231 vol. 73, no. 7, pp. 1323–1337, Jul. 1993, doi: 10.1016/0092-8674(93)90359-X.
- 1232 [109] M. R. Koelle, W. S. Talbot, W. A. Seagraves, M. T. Bender, P. Cherbas, and D. S.  
1233 Hogness, “The drosophila EcR gene encodes an ecdysone receptor, a new member of  
1234 the steroid receptor superfamily,” *Cell*, vol. 67, no. 1, pp. 59–77, Oct. 1991, doi:  
1235 10.1016/0092-8674(91)90572-G.
- 1236 [110] A. A. Sullivan and C. S. Thummel, “Temporal Profiles of Nuclear Receptor Gene  
1237 Expression Reveal Coordinate Transcriptional Responses during Drosophila  
1238 Development,” *Molecular Endocrinology*, vol. 17, no. 11, pp. 2125–2137, Nov. 2003, doi:  
1239 10.1210/me.2002-0430.
- 1240 [111] C. Justet, J. A. Hernández, A. Torriglia, and S. Chifflet, “Fast calcium wave inhibits  
1241 excessive apoptosis during epithelial wound healing,” *Cell and tissue research*, vol. 365,  
1242 no. 2, Art. no. 2, 2016.
- 1243 [112] F. Saad and D. R. Hipfner, “Extensive crosstalk of G protein-coupled receptors with the  
1244 Hedgehog signalling pathway,” *Development*, vol. 148, no. 7, p. dev189258, Apr. 2021,  
1245 doi: 10.1242/dev.189258.
- 1246 [113] N. Katanayeva, D. Kopein, R. Portmann, D. Hess, and V. L. Katanaev, “Competing  
1247 Activities of Heterotrimeric G Proteins in Drosophila Wing Maturation,” *PLOS ONE*, vol. 5,  
1248 no. 8, p. e12331, Aug. 2010, doi: 10.1371/journal.pone.0012331.

- 1249 [114] L. F. Sobala and P. N. Adler, “The Gene Expression Program for the Formation of Wing  
1250 Cuticle in *Drosophila*,” *PLoS Genetics*, vol. 12, no. 5, p. e1006100, May 2016, doi:  
1251 10.1371/journal.pgen.1006100.
- 1252 [115] D. Y. Jhon *et al.*, “Cloning, sequencing, purification, and Gq-dependent activation of  
1253 phospholipase C-beta 3,” *J Biol Chem*, vol. 268, no. 9, pp. 6654–6661, Mar. 1993.
- 1254 [116] C. W. Lee, K. H. Lee, S. B. Lee, D. Park, and S. G. Rhee, “Regulation of phospholipase  
1255 C-beta 4 by ribonucleotides and the alpha subunit of Gq,” *Journal of Biological*  
1256 *Chemistry*, vol. 269, no. 41, pp. 25335–25338, Oct. 1994, doi: 10.1016/S0021-  
1257 9258(18)47252-3.
- 1258 [117] S. Banerjee *et al.*, “Compensation of Inositol 1,4,5-Trisphosphate Receptor Function by  
1259 Altering Sarco-Endoplasmic Reticulum Calcium ATPase Activity in the *Drosophila* Flight  
1260 Circuit,” *J. Neurosci.*, vol. 26, no. 32, pp. 8278–8288, Aug. 2006, doi:  
1261 10.1523/JNEUROSCI.1231-06.2006.
- 1262 [118] H. Streb, R. F. Irvine, M. J. Berridge, and I. Schulz, “Release of Ca<sup>2+</sup> from a  
1263 nonmitochondrial intracellular store in pancreatic acinar cells by inositol-1,4,5-  
1264 trisphosphate,” *Nature*, vol. 306, no. 5938, Art. no. 5938, Nov. 1983, doi:  
1265 10.1038/306067a0.
- 1266 [119] T. Furuichi, S. Yoshikawa, A. Miyawaki, K. Wada, N. Maeda, and K. Mikoshiba, “Primary  
1267 structure and functional expression of the inositol 1,4,5-trisphosphate-binding protein  
1268 P400,” *Nature*, vol. 342, no. 6245, Art. no. 6245, Nov. 1989, doi: 10.1038/342032a0.
- 1269 [120] M. J. Berridge and R. F. Irvine, “Inositol trisphosphate, a novel second messenger in  
1270 cellular signal transduction,” *Nature*, vol. 312, no. 5992, pp. 315–321, Nov. 1984, doi:  
1271 10.1038/312315a0.
- 1272 [121] G. Sánchez-Fernández *et al.*, “Gαq signalling: The new and the old,” *Cellular Signalling*,  
1273 vol. 26, no. 5, pp. 833–848, May 2014, doi: 10.1016/j.cellsig.2014.01.010.

- 1274 [122] “Cooperative mitogenic signaling by G protein-coupled receptors and growth factors is  
1275 dependent on Gq/11”, doi: 10.1096/fj.05-5622fje.
- 1276 [123] D. Zindel *et al.*, “G protein-coupled receptors can control the Hippo/YAP pathway through  
1277 Gq signaling,” *The FASEB Journal*, vol. 35, no. 7, p. e21668, 2021, doi:  
1278 10.1096/fj.202002159R.
- 1279 [124] A. L. Howes, S. Miyamoto, J. W. Adams, E. A. Woodcock, and J. H. Brown, “Gαq  
1280 expression activates EGFR and induces Akt mediated cardiomyocyte survival:  
1281 dissociation from Gαq mediated hypertrophy,” *Journal of Molecular and Cellular  
1282 Cardiology*, vol. 40, no. 5, pp. 597–604, May 2006, doi: 10.1016/j.yjmcc.2005.12.003.
- 1283 [125] G. Nadel, Z. Yao, I. Ben-Ami, Z. Naor, and R. Seger, “Gq-Induced Apoptosis is Mediated  
1284 by AKT Inhibition That Leads to PKC-Induced JNK Activation,” *Cell Physiol Biochem*, vol.  
1285 50, no. 1, pp. 121–135, 2018, doi: 10.1159/000493963.
- 1286 [126] C. Justet, J. A. Hernández, A. Torriglia, and S. Chifflet, “Fast calcium wave inhibits  
1287 excessive apoptosis during epithelial wound healing,” *Cell Tissue Res*, vol. 365, no. 2, pp.  
1288 343–356, Aug. 2016, doi: 10.1007/s00441-016-2388-8.
- 1289 [127] M. P. Zeidler, E. A. Bach, and N. Perrimon, “The roles of the *Drosophila* JAK/STAT  
1290 pathway,” *Oncogene*, vol. 19, no. 21, Art. no. 21, May 2000, doi: 10.1038/sj.onc.1203482.
- 1291 [128] S. Ekengren and D. Hultmark, “A Family of Turandot-Related Genes in the Humoral  
1292 Stress Response of *Drosophila*,” *Biochemical and Biophysical Research  
1293 Communications*, vol. 284, no. 4, pp. 998–1003, Jun. 2001, doi: 10.1006/bbrc.2001.5067.
- 1294 [129] R. Eferl and E. F. Wagner, “AP-1: a double-edged sword in tumorigenesis,” *Nat Rev  
1295 Cancer*, vol. 3, no. 11, Art. no. 11, Nov. 2003, doi: 10.1038/nrc1209.
- 1296 [130] M. La Fortezza, M. Schenk, A. Cosolo, A. Kolybaba, I. Grass, and A.-K. Classen,  
1297 “JAK/STAT signalling mediates cell survival in response to tissue stress,” *Development*,  
1298 vol. 143, no. 16, pp. 2907–2919, Aug. 2016, doi: 10.1242/dev.132340.

- 1299 [131] J. S. Jaszczak, J. B. Wolpe, R. Bhandari, R. G. Jaszczak, and A. Halme, “Growth  
1300 Coordination During *Drosophila melanogaster* Imaginal Disc Regeneration Is Mediated by  
1301 Signaling Through the Relaxin Receptor Lgr3 in the Prothoracic Gland,” *Genetics*, vol.  
1302 204, no. 2, pp. 703–709, Oct. 2016, doi: 10.1534/genetics.116.193706.
- 1303 [132] E. H. T. Wu, R. K. H. Lo, and Y. H. Wong, “Regulation of STAT3 activity by G16-coupled  
1304 receptors,” *Biochemical and Biophysical Research Communications*, vol. 303, no. 3, pp.  
1305 920–925, Apr. 2003, doi: 10.1016/S0006-291X(03)00451-0.
- 1306 [133] P. T. Ram, C. M. Horvath, and R. Iyengar, “Stat3-Mediated Transformation of NIH-3T3  
1307 Cells by the Constitutively Active Q205L Gao Protein,” *Science*, vol. 287, no. 5450, pp.  
1308 142–144, Jan. 2000, doi: 10.1126/science.287.5450.142.
- 1309 [134] L. Bellocchio *et al.*, “Sustained Gq-Protein Signaling Disrupts Striatal Circuits via JNK,” *J.*  
1310 *Neurosci.*, vol. 36, no. 41, pp. 10611–10624, Oct. 2016, doi: 10.1523/JNEUROSCI.1192-  
1311 16.2016.
- 1312 [135] J. P. Vaqué *et al.*, “A Genome-wide RNAi Screen Reveals a Trio-Regulated Rho GTPase  
1313 Circuitry Transducing Mitogenic Signals Initiated by G Protein-Coupled Receptors,”  
1314 *Molecular Cell*, vol. 49, no. 1, pp. 94–108, Jan. 2013, doi: 10.1016/j.molcel.2012.10.018.
- 1315 [136] X. Liang *et al.*, “Arabidopsis heterotrimeric G proteins regulate immunity by directly  
1316 coupling to the FLS2 receptor,” *eLife*, vol. 5, p. e13568, Apr. 2016, doi:  
1317 10.7554/eLife.13568.
- 1318 [137] L. Zhang and G. Shi, “Gq-Coupled Receptors in Autoimmunity,” *Journal of Immunology*  
1319 *Research*, vol. 2016, p. e3969023, Jan. 2016, doi: 10.1155/2016/3969023.
- 1320 [138] H. Qian *et al.*, “Role of Galphaq in pathogenesis of psoriasis, a new mechanism about the  
1321 immune regulation in psoriasis,” *International Immunopharmacology*, vol. 68, pp. 185–  
1322 192, Mar. 2019, doi: 10.1016/j.intimp.2018.12.054.

- 1323 [139] H. Zhu *et al.*, “Arabidopsis Extra Large G-Protein 2 (XLG2) Interacts with the G $\beta$  Subunit  
1324 of Heterotrimeric G Protein and Functions in Disease Resistance,” *Molecular Plant*, vol. 2,  
1325 no. 3, pp. 513–525, May 2009, doi: 10.1093/mp/ssp001.
- 1326 [140] F. Saad and D. R. Hipfner, “Extensive crosstalk of G protein-coupled receptors with the  
1327 Hedgehog signalling pathway,” *Development*, vol. 148, no. 7, p. dev189258, Apr. 2021,  
1328 doi: 10.1242/dev.189258.
- 1329 [141] Z. ZhengHong and Z. Ru, “Research progress on the longevity gene methuselah in  
1330 *Drosophila*,” *Acta Entomologica Sinica*, vol. 55, no. 12, pp. 1394–1398, 2012.
- 1331 [142] Y.-L. Li *et al.*, “Identification and Functional Analysis of G Protein-Coupled Receptors in  
1332 20-Hydroxyecdysone Signaling From the *Helicoverpa armigera* Genome,” *Frontiers in cell  
1333 and developmental biology*, vol. 9, 2021.
- 1334 [143] T. Mukherjee, U. Schäfer, and M. P. Zeidler, “Identification of *Drosophila* Genes  
1335 Modulating Janus Kinase/Signal Transducer and Activator of Transcription Signal  
1336 Transduction,” *Genetics*, vol. 172, no. 3, pp. 1683–1697, Mar. 2006, doi:  
1337 10.1534/genetics.105.046904.
- 1338 [144] Y.-J. I. Jong, S. K. Harmon, and K. L. O’Malley, “GPCR signalling from within the cell,”  
1339 *British Journal of Pharmacology*, vol. 175, no. 21, pp. 4026–4035, 2018, doi:  
1340 10.1111/bph.14023.
- 1341 [145] I. Fasciani *et al.*, “GPCRs in Intracellular Compartments: New Targets for Drug  
1342 Discovery,” *Biomolecules*, vol. 12, no. 10, Art. no. 10, Oct. 2022, doi:  
1343 10.3390/biom12101343.
- 1344 [146] M. Friedrich and J. W. Jones, “Gene Ages, Nomenclatures, and Functional Diversification  
1345 of the Methuselah/Methuselah-Like GPCR Family in *Drosophila* and *Tribolium*,” *Journal of  
1346 Experimental Zoology Part B: Molecular and Developmental Evolution*, vol. 326, no. 8, pp.  
1347 453–463, 2016, doi: 10.1002/jez.b.22721.

- 1348 [147] A. M. Bolger, M. Lohse, and B. Usadel, "Trimmomatic: a flexible trimmer for Illumina  
1349 sequence data," *Bioinformatics*, vol. 30, no. 15, pp. 2114–2120, Aug. 2014, doi:  
1350 10.1093/bioinformatics/btu170.
- 1351 [148] "Babraham Bioinformatics - FastQC A Quality Control tool for High Throughput Sequence  
1352 Data." <https://www.bioinformatics.babraham.ac.uk/projects/fastqc/> (accessed Feb. 16,  
1353 2022).
- 1354 [149] D. Kim, J. M. Paggi, C. Park, C. Bennett, and S. L. Salzberg, "Graph-based genome  
1355 alignment and genotyping with HISAT2 and HISAT-genotype," *Nat Biotechnol*, vol. 37,  
1356 no. 8, Art. no. 8, Aug. 2019, doi: 10.1038/s41587-019-0201-4.
- 1357 [150] H. Li *et al.*, "The Sequence Alignment/Map format and SAMtools," *Bioinformatics*, vol. 25,  
1358 no. 16, pp. 2078–2079, Aug. 2009, doi: 10.1093/bioinformatics/btp352.
- 1359 [151] S. Anders, P. T. Pyl, and W. Huber, "HTSeq--a Python framework to work with high-  
1360 throughput sequencing data," *Bioinformatics*, vol. 31, no. 2, pp. 166–169, Jan. 2015, doi:  
1361 10.1093/bioinformatics/btu638.
- 1362 [152] M. D. Robinson, D. J. McCarthy, and G. K. Smyth, "edgeR: a Bioconductor package for  
1363 differential expression analysis of digital gene expression data," *Bioinformatics*, vol. 26,  
1364 no. 1, pp. 139–140, Jan. 2010, doi: 10.1093/bioinformatics/btp616.
- 1365 [153] M. D. Robinson and G. K. Smyth, "Small-sample estimation of negative binomial  
1366 dispersion, with applications to SAGE data," *Biostatistics*, vol. 9, no. 2, pp. 321–332, Jul.  
1367 2007, doi: 10.1093/biostatistics/kxm030.
- 1368 [154] M. D. Robinson and G. K. Smyth, "Moderated statistical tests for assessing differences in  
1369 tag abundance," *Bioinformatics*, vol. 23, no. 21, pp. 2881–2887, Nov. 2007, doi:  
1370 10.1093/bioinformatics/btm453.
- 1371 [155] D. J. McCarthy, Y. Chen, and G. K. Smyth, "Differential expression analysis of multifactor  
1372 RNA-Seq experiments with respect to biological variation," *Nucleic Acids Research*, vol.  
1373 40, no. 10, pp. 4288–4297, May 2012, doi: 10.1093/nar/gks042.



1374 [156] R. J. Kinsella *et al.*, “Ensembl BioMarts: a hub for data retrieval across taxonomic space,”  
1375 *Database*, vol. 2011, no. 0, pp. bar030–bar030, Jul. 2011, doi: 10.1093/database/bar030.

1376 [157] A. M. Gontijo and A. Garelli, “The biology and evolution of the Dilp8-Lgr3 pathway: A  
1377 relaxin-like pathway coupling tissue growth and developmental timing control,”  
1378 *Mechanisms of Development*, vol. 154, pp. 44–50, Dec. 2018, doi:  
1379 10.1016/j.mod.2018.04.005.

1380

1381

1382

1383

1384

1385

1386

1387 **List of Additional Files**

1388 • **Additional File 1**

1389 ○ Document (.pdf)

1390 ○ Supplementary text

1391 ○ This file includes the figure for the trichome analysis of the intervein areas. It also  
1392 includes the figures of the results obtained from the GO enrichment analysis of  
1393 the differentially expressed genes. In addition, it contains supplementary text for  
1394 the methods used to analyze the wings and the methods used to plot the GO  
1395 enrichment results.

1396 • **Additional File 2**

1397 ○ spreadsheet (.csv)

1398 ○ Fold changes of differentially expressed genes associated with immune-related  
1399 GO terms.

1400 ○ This file contains the fold changes of differentially expressed genes involved in  
1401 immune response in response to both *Gaq* perturbations.

1402 • **Additional File 3**

1403 ○ spreadsheet (.csv)

1404 ○ Differentially expressed genes between C765>Ryr<sup>RNAi</sup> and C765>Gaq<sup>RNAi</sup>

1405 ○ This file contains the results of the differential gene expression analyses of the  
1406 RNA sequencing data for C765>Ryr<sup>RNAi</sup> vs. C765>Gaq<sup>RNAi</sup>.

1407 • **Additional File 4**

1408 ○ spreadsheet (.csv)

1409 ○ Differentially expressed genes between C765>Ryr<sup>RNAi</sup> and C765>Gaq

1410 ○ This file contains the results of the differential gene expression analyses of the  
1411 RNA sequencing data for C765>Ryr<sup>RNAi</sup> vs. C765>Gaq

1412 **Figures**

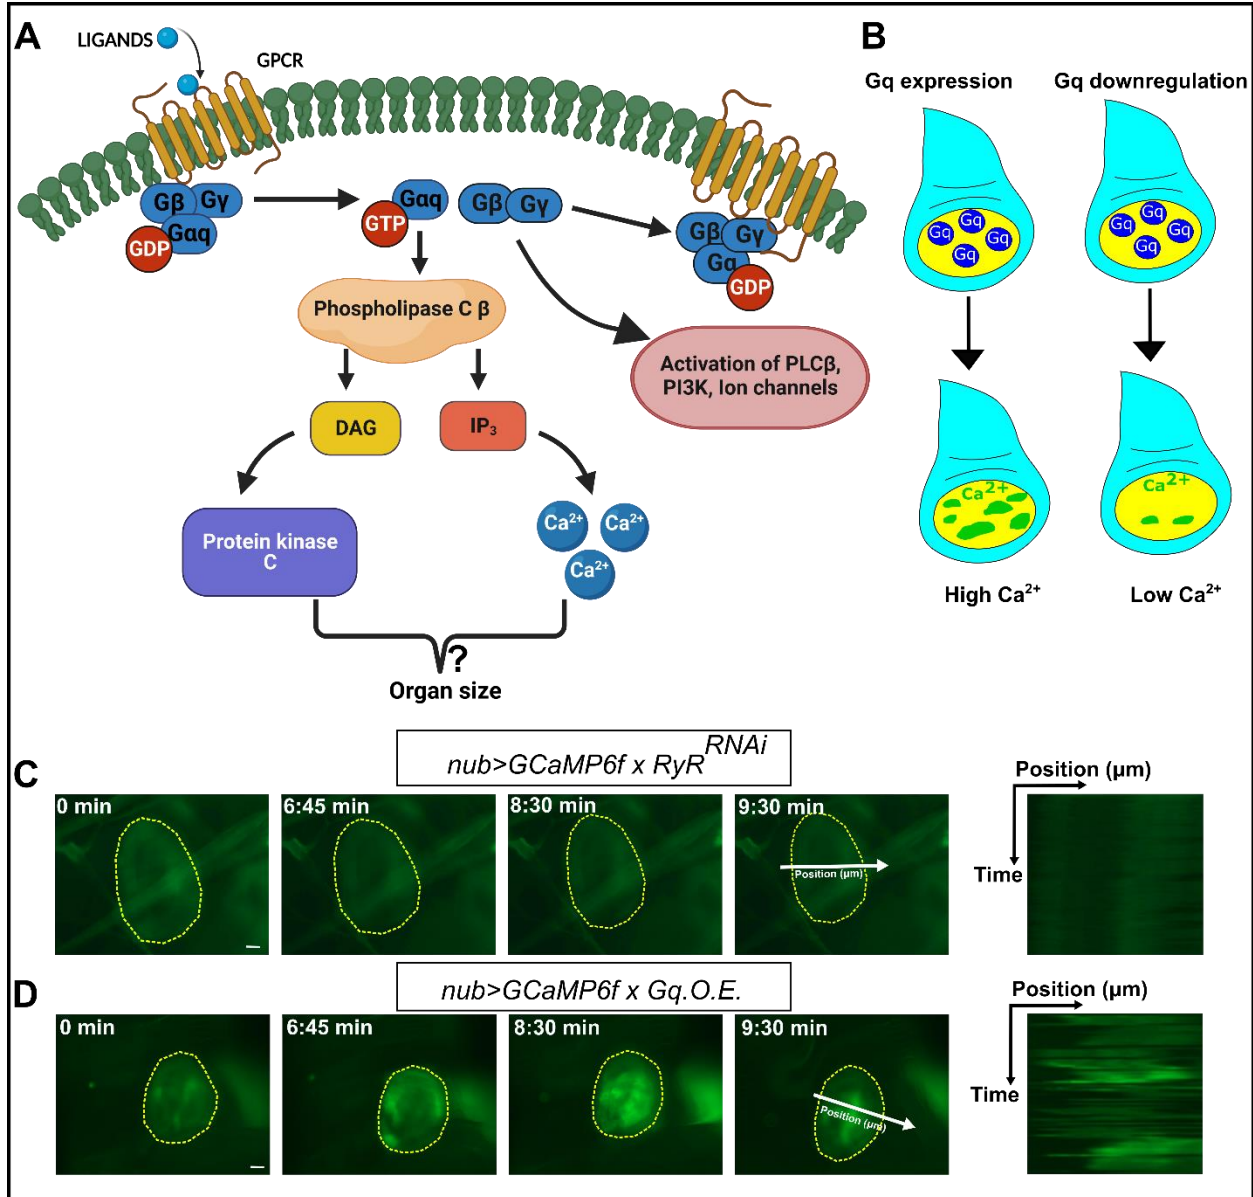

1413

1414 **Figure 1: Overexpression of Gq in the wing disc pouch is sufficient to generate periodic**

1415 **multicellular Ca<sup>2+</sup> transients and waves *in vivo*.** **A)** Schematic of G Protein signaling network

1416 (partial). Hetero-trimeric proteins Gα, Gβ, and Gγ form a complex when bound to GDP. When

1417 ligands bind to G protein-coupled receptors, the Gα dissociates from the complex by exchanging

1418 GDP with GTP. GTP-bound Gαq activates the Phospholipase C β enzyme to catalyze the

1419 conversion of PIP<sub>2</sub> to IP<sub>3</sub> and DAG. IP<sub>3</sub> binds to the IP<sub>3</sub> receptor on the endoplasmic reticulum

1420 (ER), facilitating the release of stored  $\text{Ca}^{2+}$  into the cytoplasm from ER. DAG activates PKC, which  
1421 further activates cAMP and other downstream signaling effectors. **B)** Schematic of a wing disc  
1422 expressing wild type *Gaq* (denoted as *Gaq. O.E*) in the wing disc pouch cells using a binary  
1423 expression system. High expression levels of *Gaq* result in calcium transients and waves. **C, D).**  
1424 Time-lapse images from *in vivo* imaging of wing discs expressing *RyR<sup>RNAi</sup>* and wildtype *Gaq* under  
1425 the control of the nubbin (nub)-Gal4 driver, respectively. GCaMP6 sensor was co-expressed  
1426 under the nub-Gal4 driver. Upregulation of *Gaq* in the wing disc results in the formation of periodic  
1427 intercellular  $\text{Ca}^{2+}$  waves *in vivo* (D). Minimal  $\text{Ca}^{2+}$  activity, such as  $\text{Ca}^{2+}$  spikes, was observed in  
1428 control discs expressing nonsense *RyR<sup>RNAi</sup>* (C). Yellow dotted lines indicate the wing disc pouch  
1429 boundary. The UAS lines are as follows: *Gaq<sup>WT</sup>*, BDSC:30734, *RyR<sup>RNAi</sup>*, BDSC:31540. Scale bars  
1430 indicate 20  $\mu\text{m}$ .

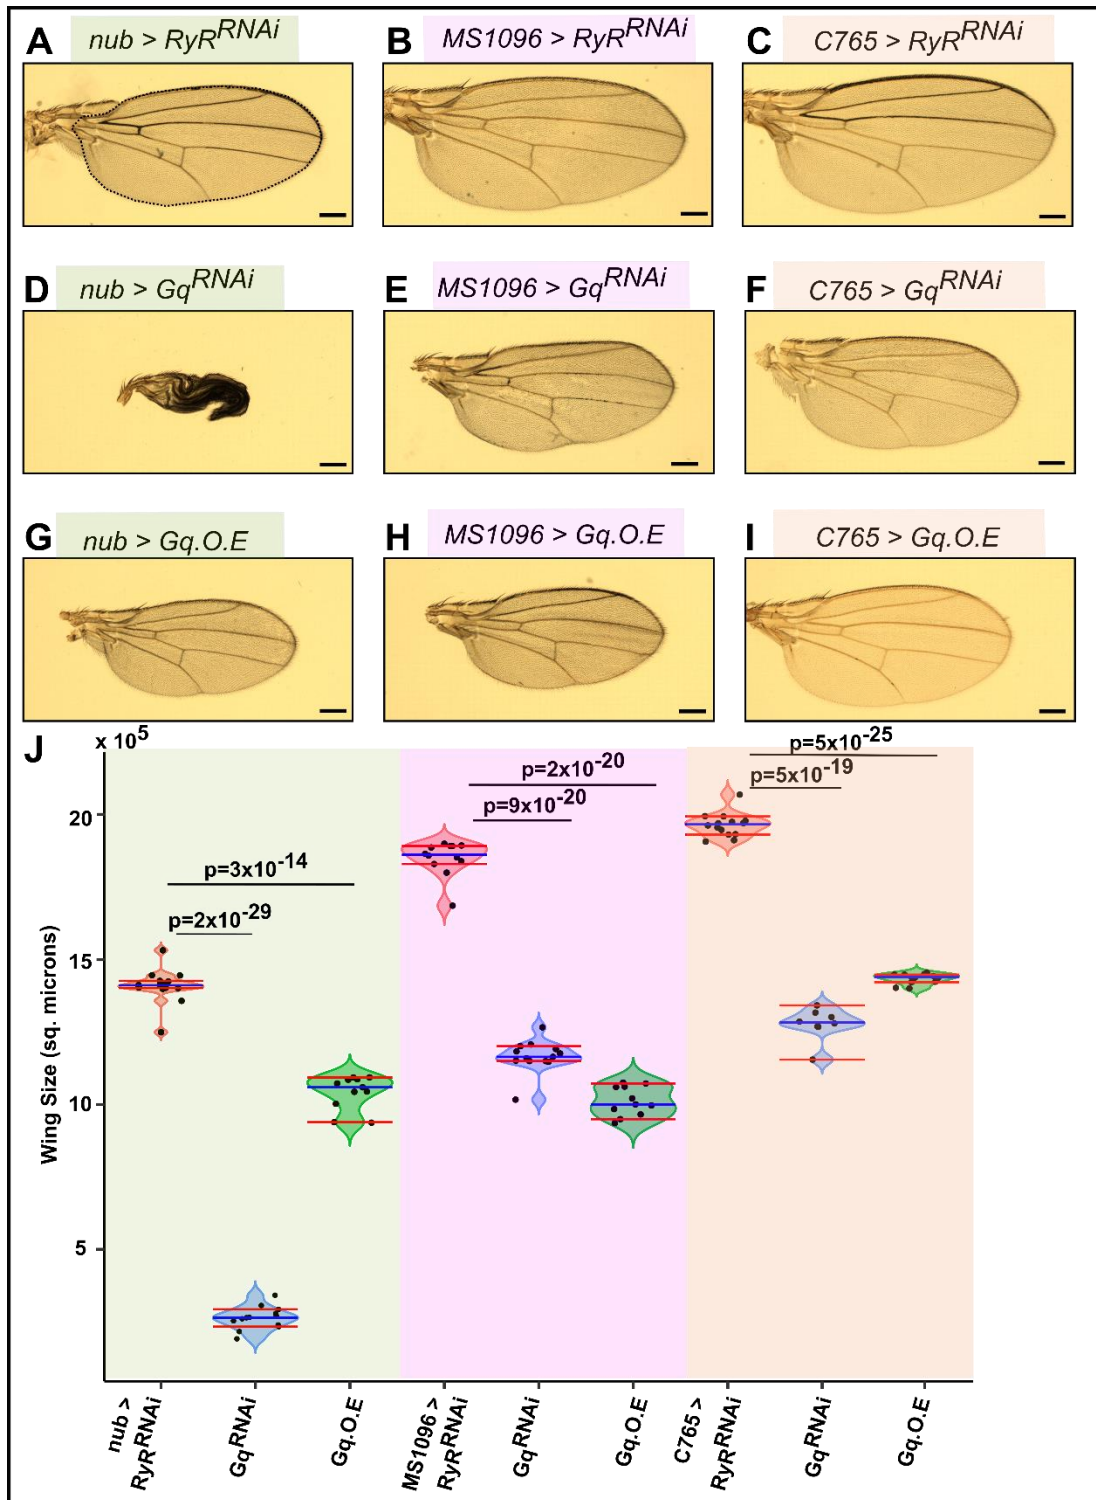

1431

1432 **Figure 2: Perturbing *Gaq* expression in the *Drosophila* wing disc decreases overall adult**

1433 **wing size and can prevent pupal wing expansion. A-I) Micrographs of adult wings expressing**

1434 *RyR<sup>RNAi</sup>* (control), wild type *Gaq*, or *Gaq<sup>RNAi</sup>* under several GAL4 drivers, including nubbin,  
1435 MS1096, and C765. **D-F)** Knockdown of *Gaq* leads to a reduction in wing size for multiple Gal4  
1436 drivers. RNAi-mediated inhibition of *Gaq* driven by the *nubbin-Gal4* driver led to severe pupal  
1437 wing expansion phenotypes. **G-I)** *Gaq* overexpression leads to decreased wing size for multiple  
1438 drivers. **J)** Graphs comparing the wing area for wings from the crosses indicated in (A-I). The blue  
1439 line represents the median, and the red lines indicate the 95% confidence interval of the median.  
1440 N > 10 for all samples shown except for *nub> Gaq<sup>RNAi</sup>* (n=8). The scale bar represents 100  
1441 microns. The blue line represents the median, and the red lines indicate the 95% confidence  
1442 interval of the median. Student two-tailed t-test was used to determine the statistical significance.

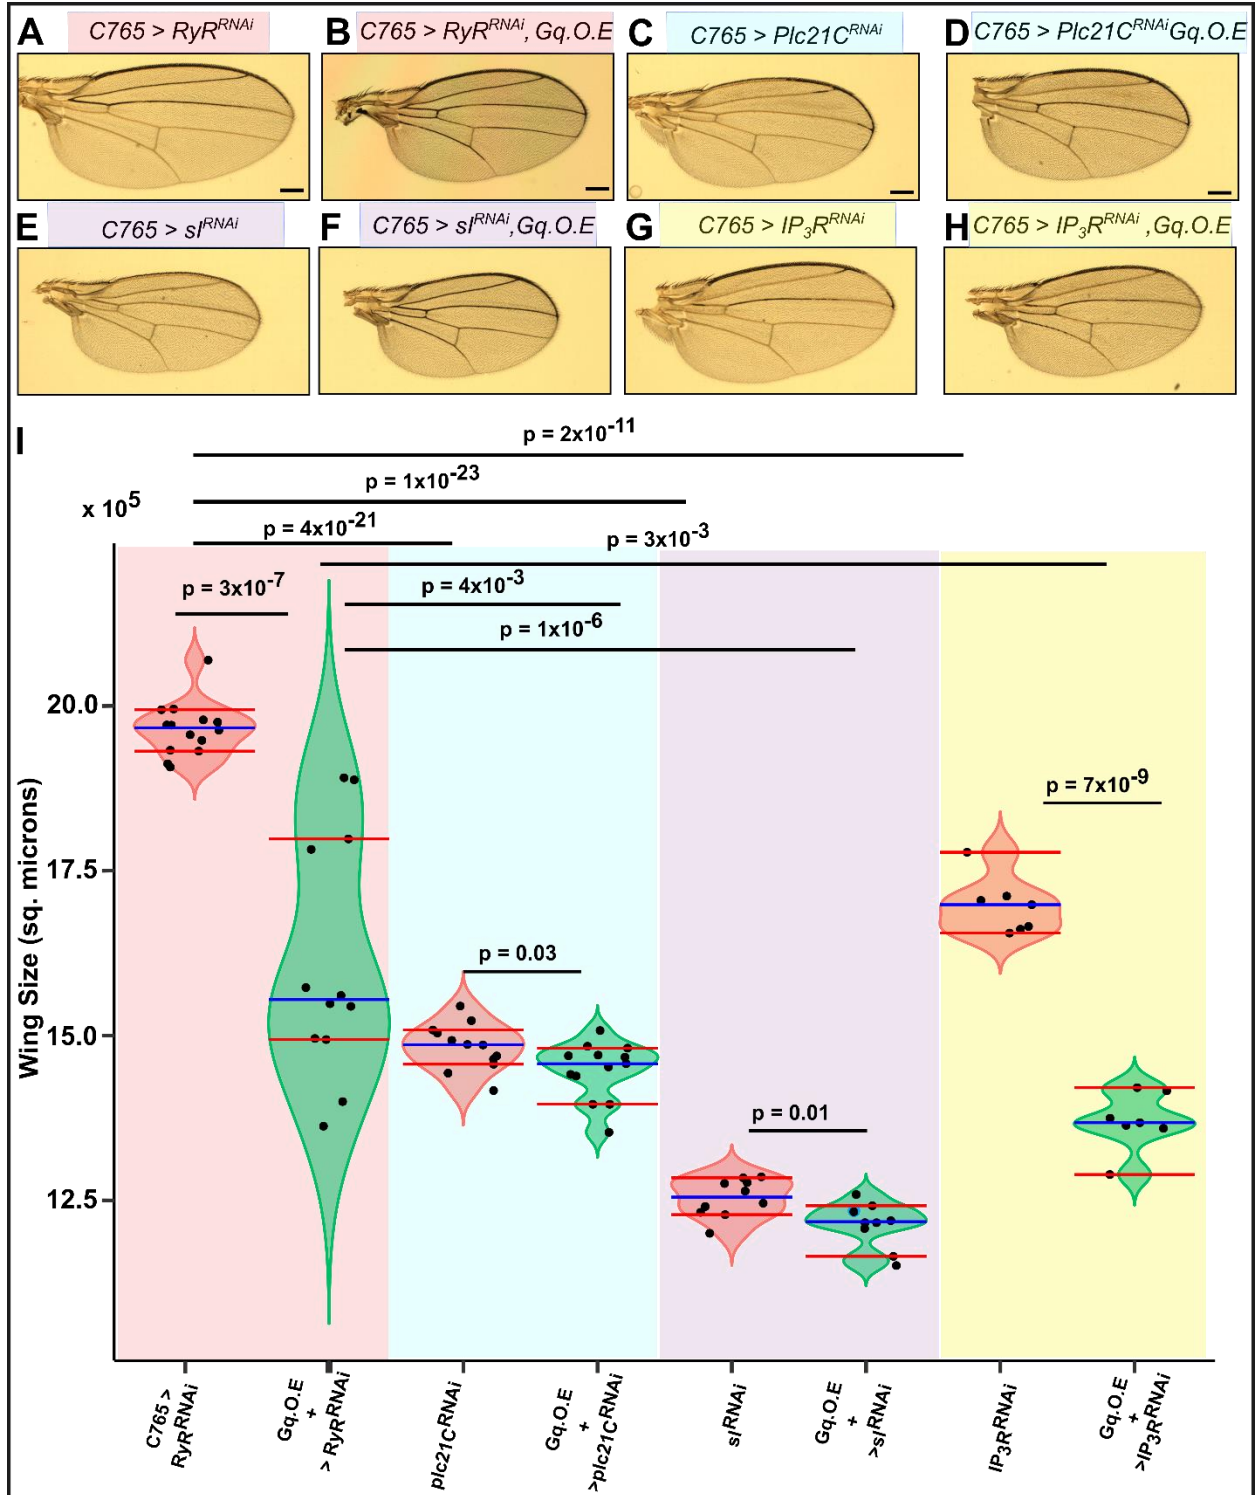

1443

1444 **Figure 3: *Gaq* overexpression, together with inhibition of  $\text{Ca}^{2+}$  signaling components,**

1445 **results in further reduction of wing size. A-H) Micrographs of adult wing images. Reduction in**

1446 **core  $\text{Ca}^{2+}$  signaling components such as *plc21c*, *sl*, and *itpr* ( $\text{IP}_3\text{R}$ ) through RNAi-mediated**

1447 knockdown in the wing disc results in a reduction of the size of the wings. Overexpressing wildtype  
1448 *Gαq*, in combination with the knockdown of Ca<sup>2+</sup> signaling components, further decreases the size  
1449 of the wings. I) Quantification of the adult wing blade areas for the crosses listed in (A-H). The  
1450 blue line represents the median, and the red lines indicate the 95% confidence interval of the  
1451 median. Scale bars are 100 μm. Student t-test was used to determine the statistical significance.

1452



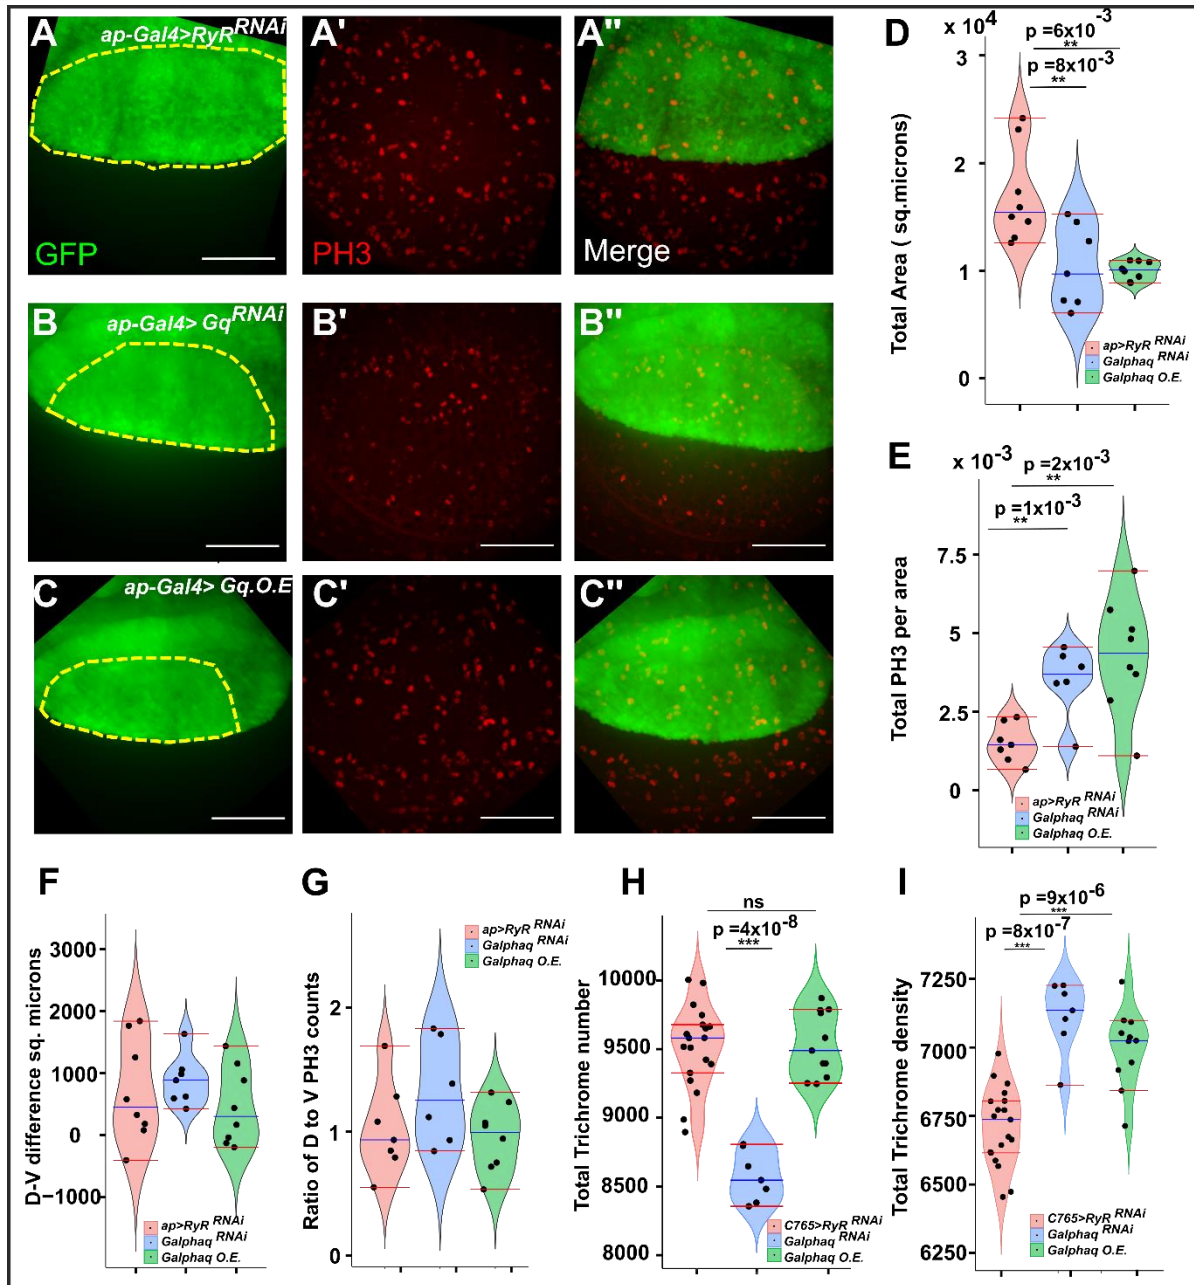

1453

1454 **Figure 4: Gαq homeostasis modulates the proliferation of wing disc and affects the overall**

1455 **cell number in the wing. A, B, C) Representative images of wing discs stained with PH3**

1456 **expressing RyR<sup>RNAi</sup>, Gαq<sup>WT</sup>, and Gαq<sup>RNAi</sup> under the control of apterous. PH3 density was higher**

1457 **in the discs with Gαq overexpression and RNAi conditions when compared to the control. D)**

1458 **Violin plots comparing the total area of the wing pouch for Gαq perturbations with control. The**

1459 **pouch area was significantly reduced in the overexpression and RNAi conditions as compared to**

1460 the control condition. **E)** Violin plot showing the density of PH3 in the wing pouch for the control  
1461 and *Gaq* perturbations. PH3 density was found to be higher in both *Gaq* overexpression and RNAi  
1462 conditions. **F)** The violin plots illustrate the difference between the area of the dorsal and ventral  
1463 regions of the wing discs under control and *Gaq* perturbations. **G)** There exists no difference in  
1464 the number of PH3 cells in the dorsal and ventral regions for all the genetic perturbations. (n>5  
1465 for all conditions) **H)** Violin plot comparing trichome number between wings with *Gaq*  
1466 overexpression, RNAi, and control conditions. Trichome number is significantly lower for wings  
1467 with *Gaq* knockdown, whereas overexpression does not show any difference. **I)** Graphs  
1468 comparing the total trichome densities for *Gaq* overexpression, *Gaq*<sup>RNAi</sup>, and *RyR*<sup>RNAi</sup>. Trichome  
1469 density is significantly higher for both overexpression and RNAi conditions indicating that *Gaq*  
1470 homeostasis affects the cell number during the growth of the wing disc.

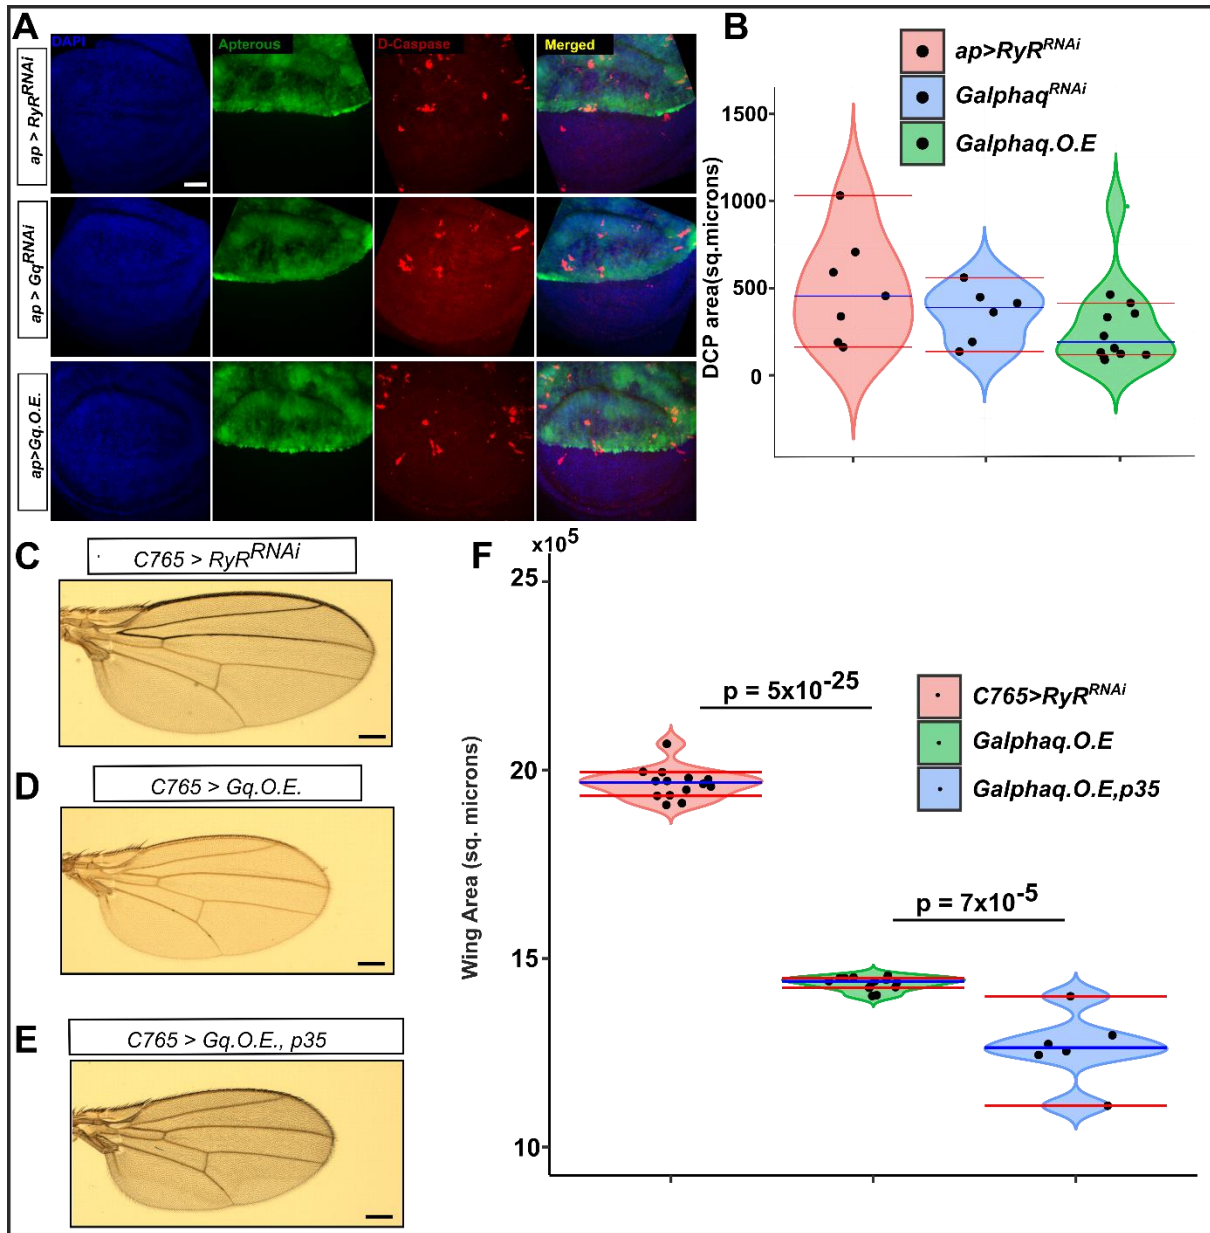

1471

1472 **Figure 5: Reduction in adult wing size for both *Gaq* overexpression and downregulation is**

1473 **not mediated by apoptosis. A)** Representative images of the third instar wing disc from the

1474 corresponding cross stained for Dcp-1 to show apoptotic cells. Wing discs were also stained with

1475 nuclear dye DAPI, and the region of GAL4 expression, which drives the *Gaq* perturbation, is

1476 indicated using GFP. All wing discs are positioned anterior to the right and posterior to the left.

1477 Sample sizes are  $n = 3$  to  $8$  for each condition. **B)** Violin plot comparing the area of Dcp-1 stain

1478 for all three genotypes. **C-E)** Micrographs of adult wings. Genotypes of individual wings are given

1479 on the top left. Ectopic expression of apoptosis inhibitor p35 did not rescue the size reduction  
1480 defect caused by overexpression of *Gaq*. **F)** Quantification of the adult wing blade area from the  
1481 indicated genotypes. Student t-test was performed, and the p-values are indicated on the plot.  
1482 The blue line represents the median, and the red lines indicate the 95% confidence interval of the  
1483 median. Scale bars represent 100  $\mu\text{m}$ .

1484

1485

1486

1487

1488

1489

1490

1491

1492

1493

1494

1495

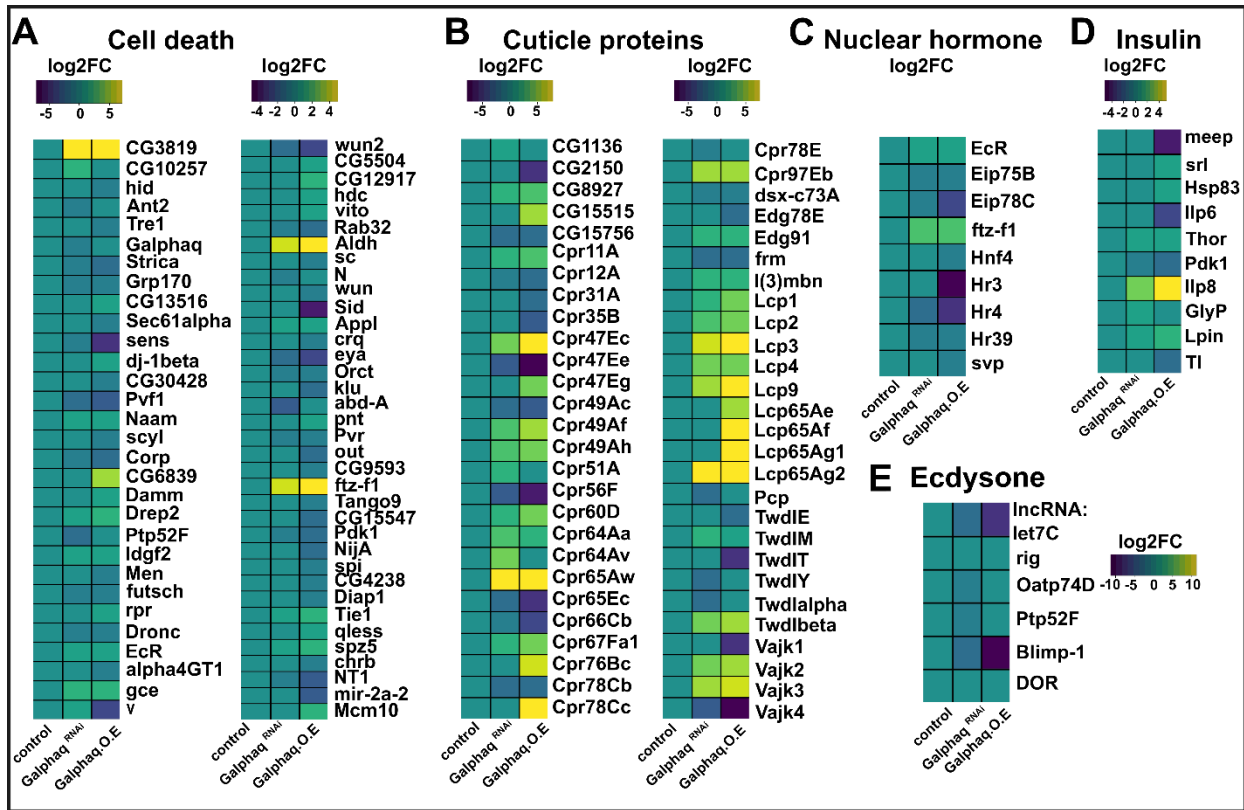

1496

1497 **Figure 6: Disruption of Gaq homeostasis delays development through transcriptional**  
 1498 **changes in multiple modules**

1499 **A)** Transcriptomic analysis of genes related to programmed cell death for *Gaq* RNAi and *Gaq*  
 1500 overexpression. The apoptotic gene (*ftz-f1*) and Mitochondrial apoptotic genes (*CG3819* and  
 1501 *Aldh*) were upregulated, and negative regulators of apoptosis (*sens*, *eya*, *Pvf1*, *futsch*) were  
 1502 downregulated in both conditions. Also, cell survival genes such as *spitz*, an EGFR ligand, were  
 1503 downregulated. **B)** Strong dysregulation of cuticle proteins is observed in both *Gaq*  
 1504 overexpression and *Gaq* RNAi conditions. **C)** Ecdysone genes (*Blimp-1*, *IncRNA: let7c*) and  
 1505 nuclear hormone receptors (*Eip78c*, *Eip75b*, *Hr3*, *Hr4*) were downregulated. *Ftz-f1* and *ECR*,  
 1506 which are expressed in early larval stages, were upregulated. **D)** Heat map plot showing gene  
 1507 expression changes of the Insulin signaling components. *Pdk1* was downregulated in both *Gaq*  
 1508 O.E. and RNAi perturbations. Relaxin-like *dilp8* was significantly upregulated in both *Gaq*  
 1509 overexpression and RNAi conditions.

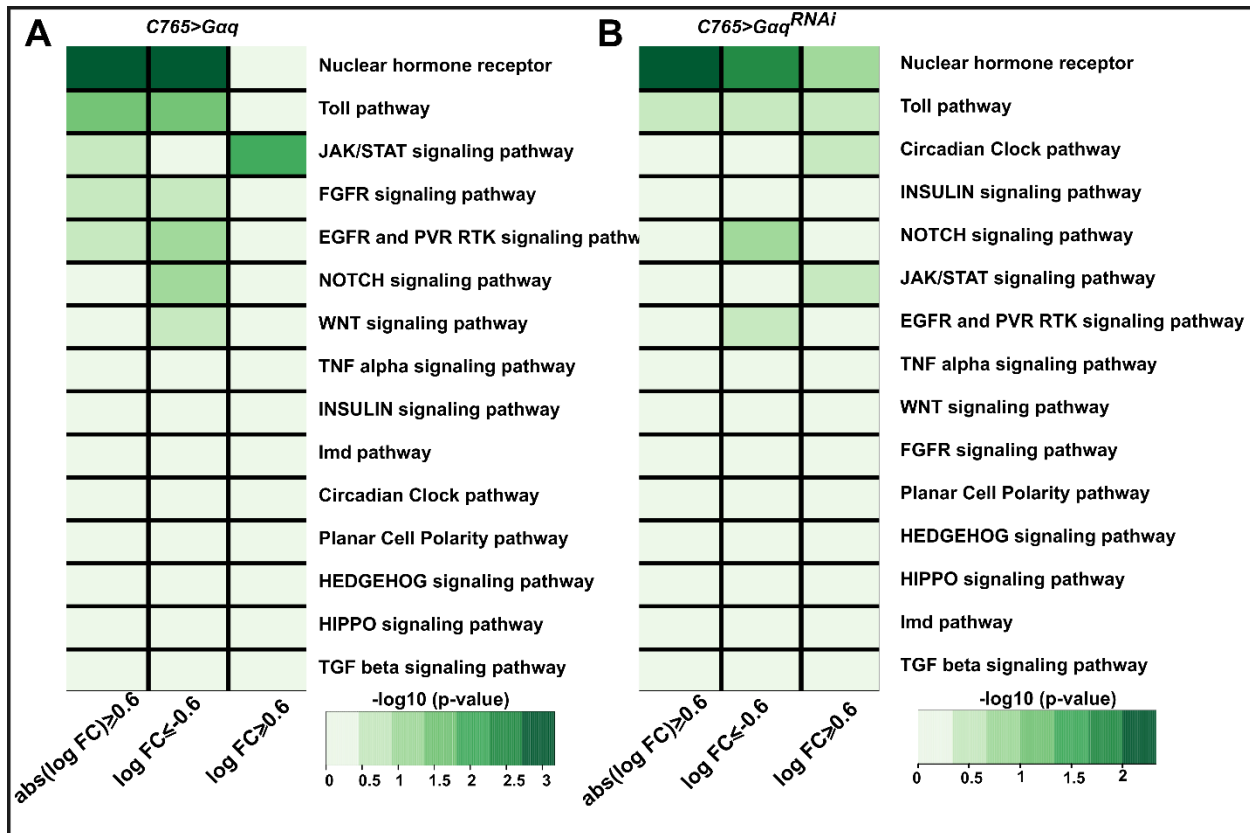

1510

1511 **Figure 7: Enrichment analysis of core signaling pathways among the differentially**

1512 **expressed genes. A)** Overexpression *Gaq* resulted in the enrichment of the Toll pathway and

1513 Nuclear hormone receptor among the differentially expressed genes with a significant fold change

1514 ( $abs(\log_2FC) \geq 0.6$ ). Toll pathway and nuclear hormone receptor pathway were enriched among

1515 the genes that were significantly downregulated ( $\log_2FC \leq -0.6$ ). JAK/STAT signaling was

1516 enriched among the significantly upregulated genes ( $\log_2FC \geq 0.6$ ). **B)** For the *Gaq<sup>RNAi</sup>*

1517 perturbation, the nuclear hormone receptor pathway was enriched among the differentially

1518 expressed genes with a significant fold change ( $abs(\log_2FC) \geq 0.6$ ). Nuclear hormone receptor

1519 pathway was enriched among the significantly downregulated genes. No core signaling pathways

1520 were enriched among the significantly upregulated genes ( $\log_2FC \leq -0.6$ ).

1521

1522

1523

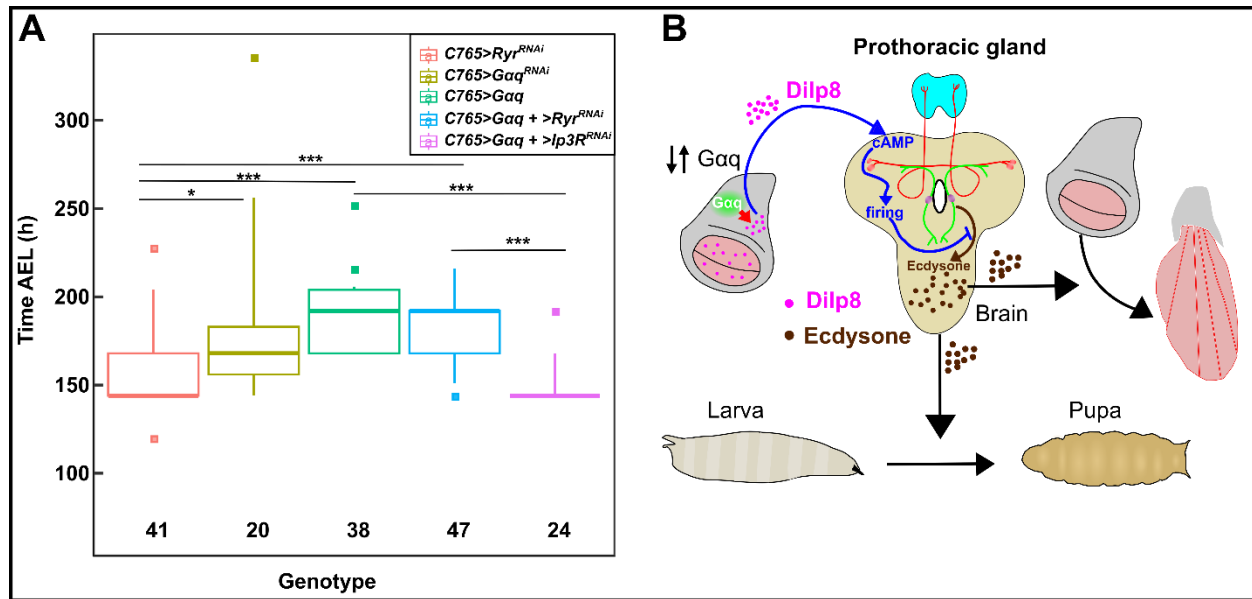

1524

1525 **Figure 8: Disruption of Gαq homeostasis delays larval to pupal transition.** A) A box plot

1526 illustrating the larval to pupal transition time for the genetic perturbations shown in the panel.

1527 Whiskers represent 5% and 95% percentiles. Square points represent the outliers. A Kruskal-

1528 Wallis test revealed significant differences in pupariation times between the *Gαq* perturbations

1529 (the degrees of freedom is 4, the H is 62, and the p-value of  $9.16 \times 10^{-13}$ ) (Degrees of freedom

1530 represents the number of groups subtracted with one. The test statistic H is compared with the

1531 critical value Chi-square for the given degrees of freedom). Conover post hoc test was used to

1532 perform multiple pairwise tests to compare the pupariation times between different genotypes.

1533 Asterisks indicate genotypes with statistically significant differences in pupariation times.

1534 Overexpression of *Gαq* delays larval to pupal transition by ~24 h, whereas *Gαq*<sup>RNAi</sup> delays

1535 transition time by ~12 h. Knockdown of *Ip3R* along with the *Gαq* overexpression rescues the

1536 developmental delay observed with *Gαq* overexpression. B) Proposed mechanism of

1537 developmental delay: Dysregulation of *Gαq* homeostasis in the wing disc upregulates *dilp-8*

1538 expression, ultimately resulting in decreased 20E synthesis from the brain. This generalization is

1539 consistent with RNA seq analysis from this work, where overexpression and downregulation of

1540 *Gag* in the wing disc result in the downregulation of 20E target genes, respectively. Figure inspired  
1541 from [157].
